# Supplementary material for: Density functional theory and atoms-in-molecule study on the role of two-electron stabilizing interactions in retro Diels–Alder reaction of cycloadducts derived from substituted cyclopentadiene and p-benzoquinone
Source: Royal Society of Chemistry journal article supplement (doi:10.1039/b610972a), 2006-01-01
Supplement: b610972a.pdf [file b610972a.pdf]

***Electronic Supplementary Information***

***For***

**Density Functional Theory and Atoms-in Molecule Study on the  
Role of Two-electron Stabilizing Interactions in Retro Diels-Alder  
Reaction of Cycloadducts Derived from Substituted Cyclopentadiene  
and p-Benzoquinone**

Mahendra P. Patil and Raghavan B. Sunoj \*

Department of Chemistry, Indian Institute of Technology Bombay, Powai,  
Mumbai 400076, India

E-mail: [sunoj@chem.iitb.ac.in](mailto:sunoj@chem.iitb.ac.in)

**Table of Contents**

|                 | Details                                                                                                                                                                                                                                                           | Page Number |
|-----------------|-------------------------------------------------------------------------------------------------------------------------------------------------------------------------------------------------------------------------------------------------------------------|-------------|
| <b>Table S1</b> | Comparison of key structural parameters obtained at the B3LYP/6-31G* level for the cycloadducts and the corresponding saturated bicyclic compounds (with hydrogenated C <sub>3</sub> -C <sub>4</sub> Bond).                                                       | S3          |
| <b>Table S2</b> | Summary of Natural Bond Orbital (NBO) analyses of cycloadducts performed at the B3LYP/6-311+G**//B3LYP/6-31G* level of theory. The second order perturbation energies reported in kcal mol <sup>-1</sup> .                                                        | S4          |
| <b>Table S3</b> | Summary of Atoms in Molecule (AIM) analyses performed with wave functions generated at the B3LYP/6-311+G**//B3LYP/6-31G* level of theory for the cycloadducts as well as the corresponding saturated analogue (hydrogenated C <sub>3</sub> -C <sub>4</sub> bond). | S5          |
| <b>Table S4</b> | Properties of bond critical points (BCP) for the C <sub>1</sub> -C <sub>5</sub> bond for the transition states computed at the AIM/B3LYP/6-311+G**//B3LYP/6-31G* level.                                                                                           | S6          |
| <b>Table S5</b> | Marcus Type Analysis Based on the Energetics of retro Diels-Alder reaction of C <sub>7</sub> substituted cycloadducts at the B3LYP/6-311+G**//B3LYP/6-31G* level of theory                                                                                        | S7          |

|                  |                                                                                                                                                                                                                                              |     |
|------------------|----------------------------------------------------------------------------------------------------------------------------------------------------------------------------------------------------------------------------------------------|-----|
| <b>Figure S1</b> | Correlation between intrinsic free energies of activation (kcal mol <sup>-1</sup> ) and electron density $\rho(r_c)$ at bond critical points for <b>1</b> to <b>19</b> at the B3LYP/6-311+G**//B3LYP/6-31G* level.                           | S8  |
| <b>Figure S2</b> | Correlation between computed intrinsic activation barrier (kcal mol <sup>-1</sup> ) and (i) bond length ( <b>S2.1</b> ) (ii) occupancies of C <sub>1</sub> -C <sub>5</sub> bond ( <b>S2.2</b> )                                              | S8  |
| <b>Table S6</b>  | The B3LYP/6-31G* optimized geometries (in Cartesian coordinates), total electronic energies (in hartree/particle), and number of imaginary frequencies for cycloadducts and the corresponding transition states for cycloreversion reaction. | S9  |
| <b>Table S7</b>  | The B3LYP/6-31G* optimized geometries (in Cartesian coordinates), total electronic energies (in hartree/particle), and number of imaginary frequencies of substituted cyclopentadienes and quinone.                                          | S21 |
| <b>Table S8</b>  | The B3LYP/6-31G* optimized geometries (in Cartesian coordinates), total electronic energies (in hartree/particle), of different rotamers of the substituent attached to the C7 position of the cycloadduct.                                  | S26 |

**Table S1.** Comparison of key structural parameters obtained at the B3LYP/6-31G\* level for the cycloadducts formed and the corresponding saturated bicyclic compounds (with hydrogenated C<sub>3</sub>-C<sub>4</sub> Bond).

| Substituents                                | 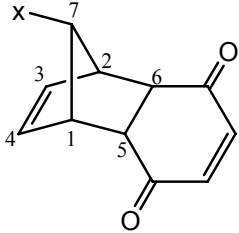 |                                |                   |  |                                |                   |
|---------------------------------------------|-----------------------------------------------------------------------------------|--------------------------------|-------------------|------------------------------------------------------------------------------------|--------------------------------|-------------------|
|                                             | C <sub>3</sub> -C <sub>4</sub>                                                    | C <sub>1</sub> -C <sub>5</sub> | C <sub>7</sub> -X | C <sub>3</sub> -C <sub>4</sub>                                                     | C <sub>1</sub> -C <sub>5</sub> | C <sub>7</sub> -X |
| -SiMe <sub>3</sub> ( <b>1</b> )             | 1.341                                                                             | 1.587                          | 1.916             | 1.560                                                                              | 1.564                          | 1.916             |
| -GeH <sub>3</sub> ( <b>2</b> )              | 1.340                                                                             | 1.586                          | 1.957             | 1.561                                                                              | 1.562                          | 1.957             |
| -BH <sub>2</sub> ( <b>3</b> )               | 1.344                                                                             | 1.582                          | 1.572             | 1.564                                                                              | 1.560                          | 1.561             |
| -PH <sub>2</sub> ( <b>4</b> )               | 1.340                                                                             | 1.585                          | 1.888             | 1.560                                                                              | 1.561                          | 1.888             |
| -CMe <sub>3</sub> ( <b>5</b> )              | 1.340                                                                             | 1.584                          | 1.555             | 1.559                                                                              | 1.563                          | 1.562             |
| -CHO ( <b>6</b> )                           | 1.340                                                                             | 1.581                          | 1.513             | 1.561                                                                              | 1.559                          | 1.510             |
| -H ( <b>7</b> )                             | 1.341                                                                             | 1.583                          | 1.094             | 1.563                                                                              | 1.561                          | 1.096             |
| -C <sub>2</sub> H <sub>5</sub> ( <b>8</b> ) | 1.340                                                                             | 1.583                          | 1.538             | 1.562                                                                              | 1.560                          | 1.534             |
| -Me ( <b>9</b> )                            | 1.340                                                                             | 1.581                          | 1.526             | 1.262                                                                              | 1.559                          | 1.530             |
| -SH ( <b>10</b> )                           | 1.341                                                                             | 1.581                          | 1.833             | 1.561                                                                              | 1.560                          | 1.844             |
| -COMe ( <b>11</b> )                         | 1.341                                                                             | 1.579                          | 1.528             | 1.561                                                                              | 1.560                          | 1.524             |
| -COOH ( <b>12</b> )                         | 1.341                                                                             | 1.579                          | 1.515             | 1.562                                                                              | 1.559                          | 1.512             |
| -Cl ( <b>13</b> )                           | 1.339                                                                             | 1.581                          | 1.810             | 1.562                                                                              | 1.560                          | 1.817             |
| -NH <sub>2</sub> ( <b>14</b> )              | 1.342                                                                             | 1.577                          | 1.450             | 1.564                                                                              | 1.557                          | 1.458             |
| -CN ( <b>15</b> )                           | 1.340                                                                             | 1.577                          | 1.463             | 1.562                                                                              | 1.557                          | 1.462             |
| -OMe ( <b>16</b> )                          | 1.339                                                                             | 1.578                          | 1.402             | 1.562                                                                              | 1.556                          | 1.411             |
| -NO <sub>2</sub> ( <b>17</b> )              | 1.340                                                                             | 1.577                          | 1.510             | 1.564                                                                              | 1.558                          | 1.512             |
| -OH ( <b>18</b> )                           | 1.344                                                                             | 1.575                          | 1.403             | 1.562                                                                              | 1.556                          | 1.417             |
| -F ( <b>19</b> )                            | 1.340                                                                             | 1.577                          | 1.380             | 1.563                                                                              | 1.556                          | 1.390             |

**Table S2.** Summary of Natural Bond Orbital (NBO) analyses of cycloadducts performed at the B3LYP/6-311+G\*\*//B3LYP/6-31G\* level of theory.<sup>a</sup> The second order perturbation energies are reported in kcal mol<sup>-1</sup>.

| Substituents                                | $\sigma(C_7-X) \rightarrow \sigma^*(C_1-C_5)$ | $\sigma(C_1-C_5) \rightarrow \sigma^*(C_7-X)$ | $\pi(C_3-C_4) \rightarrow \sigma^*(C_1-C_5)$ | $\sigma(C_1-C_5) \rightarrow \pi^*(C_3-C_4)$ | Occupancy of $\sigma^*(C_1-C_5)$ | Occupancy of $\sigma(C_1-C_5)$ |
|---------------------------------------------|-----------------------------------------------|-----------------------------------------------|----------------------------------------------|----------------------------------------------|----------------------------------|--------------------------------|
| -SiMe <sub>3</sub> ( <b>1</b> )             | 1.72                                          | 2.57                                          | 3.25                                         | 2.79                                         | 0.03582                          | 1.9415                         |
| -GeH <sub>3</sub> ( <b>2</b> )              | 1.83                                          | 3.90                                          | 3.23                                         | 2.76                                         | 0.03547                          | 1.9410                         |
| -BH <sub>2</sub> ( <b>3</b> )               | 1.62                                          | 2.78                                          | 3.14                                         | 2.69                                         | 0.03368                          | 1.9440                         |
| -PH <sub>2</sub> ( <b>4</b> )               | 1.72                                          | 4.11                                          | 3.26                                         | 2.72                                         | 0.03348                          | 1.9401                         |
| -CMe <sub>3</sub> ( <b>5</b> )              | 0.74                                          | 3.60                                          | 3.26                                         | 2.86                                         | 0.03080                          | 1.9412                         |
| -CHO ( <b>6</b> )                           | 1.03                                          | 2.98                                          | 3.21                                         | 2.66                                         | 0.03126                          | 1.9440                         |
| -H ( <b>7</b> )                             | 1.81                                          | 2.32                                          | 3.30                                         | 2.65                                         | 0.03270                          | 1.9444                         |
| -C <sub>2</sub> H <sub>5</sub> ( <b>8</b> ) | 1.00                                          | 3.12                                          | 3.20                                         | 2.70                                         | 0.03011                          | 1.9429                         |
| -Me ( <b>9</b> )                            | 1.03                                          | 3.36                                          | 3.20                                         | 2.69                                         | 0.03032                          | 1.9431                         |
| -SH ( <b>10</b> )                           | 1.23                                          | 4.99                                          | 3.22                                         | 2.70                                         | 0.03181                          | 1.9382                         |
| -COMe ( <b>11</b> )                         | 1.05                                          | 2.94                                          | 3.04                                         | 2.65                                         | 0.02914                          | 1.9445                         |
| -COOH ( <b>12</b> )                         | 1.13                                          | 2.77                                          | 3.11                                         | 2.59                                         | 0.02940                          | 1.9453                         |
| -Cl ( <b>13</b> )                           | 1.10                                          | 5.53                                          | 3.33                                         | 2.60                                         | 0.03105                          | 1.9377                         |
| -NH <sub>2</sub> ( <b>14</b> )              | 0.87                                          | 3.45                                          | 3.16                                         | 2.68                                         | 0.02800                          | 1.9434                         |
| -CN ( <b>15</b> )                           | 0.96                                          | 3.07                                          | 3.19                                         | 2.52                                         | 0.02974                          | 1.9464                         |
| -OMe ( <b>16</b> )                          | 0.75                                          | 3.65                                          | 3.25                                         | 2.59                                         | 0.02763                          | 1.9433                         |
| -NO <sub>2</sub> ( <b>17</b> )              | 0.76                                          | 4.62                                          | 3.26                                         | 2.50                                         | 0.02957                          | 1.9440                         |
| -OH ( <b>18</b> )                           | 0.61                                          | 3.82                                          | 3.22                                         | 2.63                                         | 0.02878                          | 1.9428                         |
| -F ( <b>19</b> )                            | 0.62                                          | 4.19                                          | 3.34                                         | 2.52                                         | 0.02871                          | 1.9428                         |

<sup>a</sup> Second order perturbation energies for various delocalizations are represented as “donor → acceptor” in this table

**Table S3.** Summary of Atoms in Molecule (AIM) analyses performed with wave functions generated at the B3LYP/6-311+G\*\*//B3LYP/6-31G\* level of theory for the cycloadducts as well as the corresponding saturated analogue (hydrogenated C<sub>3</sub>-C<sub>4</sub> bond).

| Substituents                       | C <sub>3</sub> -C <sub>4</sub> unsaturated cycloadduct |                   |            |                        | C <sub>3</sub> -C <sub>4</sub> saturated compound |                   |            |                        |
|------------------------------------|--------------------------------------------------------|-------------------|------------|------------------------|---------------------------------------------------|-------------------|------------|------------------------|
|                                    | $\rho(r_c)^a$                                          | $\nabla^2(r_c)^a$ | $H(r_c)^a$ | Wiberg BI <sup>b</sup> | $\rho(r_c)^a$                                     | $\nabla^2(r_c)^a$ | $H(r_c)^a$ | Wiberg BI <sup>b</sup> |
| -SiMe <sub>3</sub> (1)             | 0.2144                                                 | 0.1008            | -3.135     | 0.9383                 | 0.2269                                            | 0.1158            | -3.356     | 0.9661                 |
| -GeH <sub>3</sub> (2)              | 0.2152                                                 | 0.1018            | -3.141     | 0.9383                 | 0.2276                                            | 0.1166            | -3.3619    | 0.9652                 |
| -BH <sub>2</sub> (3)               | 0.2170                                                 | 0.1041            | -2.734     | 0.9439                 | 0.2286                                            | 0.1172            | -2.919     | 0.9693                 |
| -PH <sub>2</sub> (4)               | 0.2160                                                 | 0.1028            | -2.879     | 0.9396                 | 0.2280                                            | 0.1172            | -3.078     | 0.9667                 |
| -CMe <sub>3</sub> (5)              | 0.2159                                                 | 0.1027            | -3.087     | 0.9429                 | 0.2272                                            | 0.1164            | -3.286     | 0.9705                 |
| -CHO (6)                           | 0.2175                                                 | 0.1045            | -2.862     | 0.9460                 | 0.2292                                            | 0.1173            | -3.058     | 0.9721                 |
| -H (7)                             | 0.2164                                                 | 0.1034            | -2.631     | 0.9446                 | 0.2282                                            | 0.1176            | -2.814     | 0.9701                 |
| -C <sub>2</sub> H <sub>5</sub> (8) | 0.2171                                                 | 0.1042            | -2.875     | 0.9444                 | 0.2287                                            | 0.1183            | -3.068     | 0.9706                 |
| -Me (9)                            | 0.2172                                                 | 0.1044            | -2.776     | 0.9455                 | 0.2288                                            | 0.1184            | -2.9646    | 0.9709                 |
| -SH (10)                           | 0.2172                                                 | 0.1042            | -2.9012    | 0.9397                 | 0.2281                                            | 0.1174            | -3.087     | 0.9671                 |
| -COMe (11)                         | 0.2186                                                 | 0.1058            | -2.992     | 0.9483                 | 0.2290                                            | 0.1186            | -3.174     | 0.9720                 |
| -COOH (12)                         | 0.2190                                                 | 0.1064            | -3.006     | 0.9490                 | 0.2292                                            | 0.1189            | -3.1813    | 0.9721                 |
| -Cl (13)                           | 0.2172                                                 | 0.1043            | -2.909     | 0.9396                 | 0.2284                                            | 0.1179            | -3.098     | 0.9636                 |
| -NH <sub>2</sub> (14)              | 0.2189                                                 | 0.1065            | -2.805     | 0.9484                 | 0.2298                                            | 0.1194            | -2.984     | 0.9729                 |
| -CN (15)                           | 0.2199                                                 | 0.1075            | -2.865     | 0.9504                 | 0.2306                                            | 0.1206            | -3.043     | 0.9730                 |
| -OMe (16)                          | 0.2189                                                 | 0.1068            | -2.918     | 0.9485                 | 0.2296                                            | 0.1191            | -3.112     | 0.9752                 |
| -NO <sub>2</sub> (17)              | 0.2195                                                 | 0.1071            | -3.027     | 0.9477                 | 0.2298                                            | 0.1197            | -3.207     | 0.9700                 |
| -OH (18)                           | 0.2194                                                 | 0.1069            | -2.818     | 0.9480                 | 0.2298                                            | 0.1194            | -2.991     | 0.9701                 |
| -F (19)                            | 0.2189                                                 | 0.1063            | -2.817     | 0.9473                 | 0.2300                                            | 0.1199            | -3.000     | 0.9711                 |

<sup>a</sup>  $\rho(r_c)$ ,  $\nabla^2(r_c)$  and  $H$  are respectively the electron density, Laplacian of electron density and the total energy density at the BCP. <sup>b</sup>Wiberg Bond index computed at the B3LYP//6-311+G\*\*/6-31G\* level of theory

**Table S4.** Properties of bond critical points (BCP) for the C<sub>1</sub>-C<sub>5</sub> bond for the transition states computed at the AIM/B3LYP/6-311+G\*\*//B3LYP/6-31G\* level

| Substituents                       | $\rho(r_c)^a$ | $\nabla^2(r_c)^a$ | $H^a$   |
|------------------------------------|---------------|-------------------|---------|
| -SiMe <sub>3</sub> (1)             | 0.06395       | -0.00851          | -0.8777 |
| -GeH <sub>3</sub> (2)              | 0.06235       | -0.00897          | -0.8521 |
| -BH <sub>2</sub> (3)               | 0.06148       | -0.00931          | -0.7202 |
| -PH <sub>2</sub> (4)               | 0.06030       | -0.00940          | -0.7474 |
| -CMe <sub>3</sub> (5)              | 0.05863       | -0.00945          | -0.7815 |
| -CHO (6)                           | 0.05953       | -0.00959          | -0.7275 |
| -H (7)                             | 0.05735       | -0.00995          | -0.6437 |
| -C <sub>2</sub> H <sub>5</sub> (8) | 0.05807       | -0.00961          | -0.7155 |
| -Me (9)                            | 0.05606       | -0.00100          | -0.6621 |
| -SH (10)                           | 0.05624       | -0.01010          | -0.6961 |
| -COMe (11)                         | 0.05409       | -0.01033          | -0.6958 |
| -COOH (12)                         | 0.05579       | -0.01012          | -0.7099 |
| -Cl (13)                           | 0.05428       | -0.01049          | -0.6725 |
| -NH <sub>2</sub> (14)              | 0.05407       | -0.01033          | -0.6392 |
| -CN (15)                           | 0.05533       | -0.01011          | -0.6653 |
| -OMe (16)                          | 0.05225       | -0.01067          | -0.6429 |
| -NO <sub>2</sub> (17)              | 0.05378       | -0.01041          | -0.6856 |
| -OH (18)                           | 0.05205       | -0.01082          | -0.6157 |
| -F (19)                            | 0.05105       | -0.01097          | -0.6047 |

<sup>a</sup>  $\rho(r_c)$ ,  $\nabla^2(r_c)$  and  $H$  are respectively the electron density, Laplacian of electron density and the total energy density at the BCP.

**Table S5.** Marcus Type Analysis Based on the Energetics of retro Diels-Alder reaction of C<sub>7</sub> substituted cycloadducts at the B3LYP/6-311+G\*\*//B3LYP/6-31G\* level of theory<sup>a</sup>

| Substituents                                | $\Delta G^\ddagger_{298}$ | $\Delta G^\ddagger_{\text{intrinsic}}$ | $\Delta G_{298}$ |
|---------------------------------------------|---------------------------|----------------------------------------|------------------|
| -SiMe <sub>3</sub> ( <b>1</b> )             | 20.28                     | 27.42                                  | -15.36           |
| -GeH <sub>3</sub> ( <b>2</b> )              | 21.19                     | 27.57                                  | -13.60           |
| -BH <sub>2</sub> ( <b>3</b> )               | 23.41                     | 28.47                                  | -10.62           |
| -PH <sub>2</sub> ( <b>4</b> )               | 23.58                     | 28.51                                  | -10.34           |
| -CMe <sub>3</sub> ( <b>5</b> )              | 23.77                     | 29.19                                  | -11.40           |
| -CHO ( <b>6</b> )                           | 24.40                     | 28.97                                  | -9.55            |
| -H ( <b>8</b> )                             | 24.69                     | 28.44                                  | -7.77            |
| -C <sub>2</sub> H <sub>5</sub> ( <b>7</b> ) | 25.62                     | 27.96                                  | -4.79            |
| -Me ( <b>9</b> )                            | 25.84                     | 29.53                                  | -7.64            |
| -SH ( <b>10</b> )                           | 26.15                     | 29.43                                  | -6.77            |
| -COMe ( <b>11</b> )                         | 26.59                     | 30.94                                  | -9.03            |
| -COOH ( <b>12</b> )                         | 27.53                     | 30.99                                  | -7.14            |
| -Cl ( <b>13</b> )                           | 27.41                     | 30.28                                  | -5.89            |
| -NH <sub>2</sub> ( <b>14</b> )              | 28.57                     | 29.62                                  | -2.39            |
| -CN ( <b>15</b> )                           | 28.76                     | 31.95                                  | -6.55            |
| -OMe ( <b>16</b> )                          | 29.42                     | 31.01                                  | -3.24            |
| -NO <sub>2</sub> ( <b>17</b> )              | 29.65                     | 32.29                                  | -5.41            |
| -OH ( <b>18</b> )                           | 29.98                     | 30.49                                  | -1.08            |
| -F ( <b>19</b> )                            | 29.98                     | 31.27                                  | -2.62            |

<sup>a</sup> T. H. Lowry and K. S. Richardson 'Mechanism and Theory in Organic Chemistry' 3<sup>rd</sup> Ed. Harper Collins Publishers, New York, 1987. (page 225)

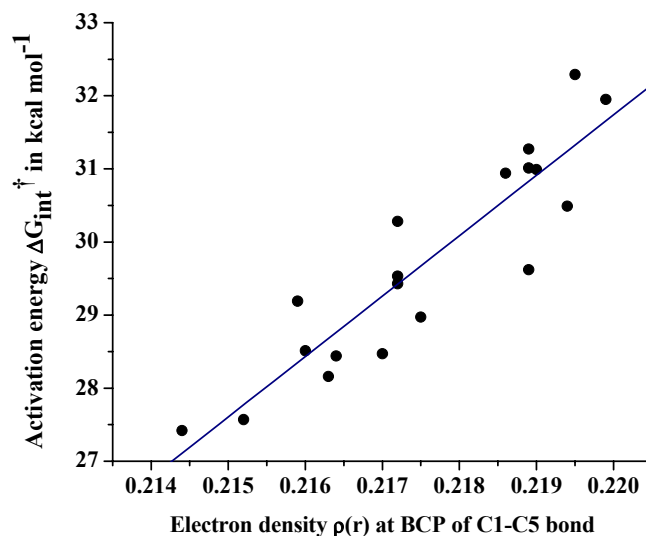

**Figure S1.** Correlation between intrinsic free energies of activation (kcal mol $^{-1}$ ) and electron density  $\rho(r_c)$  at bond critical points for **1** to **19** at the B3LYP/6-311+G\*\*//B3LYP/6-31G\* level.

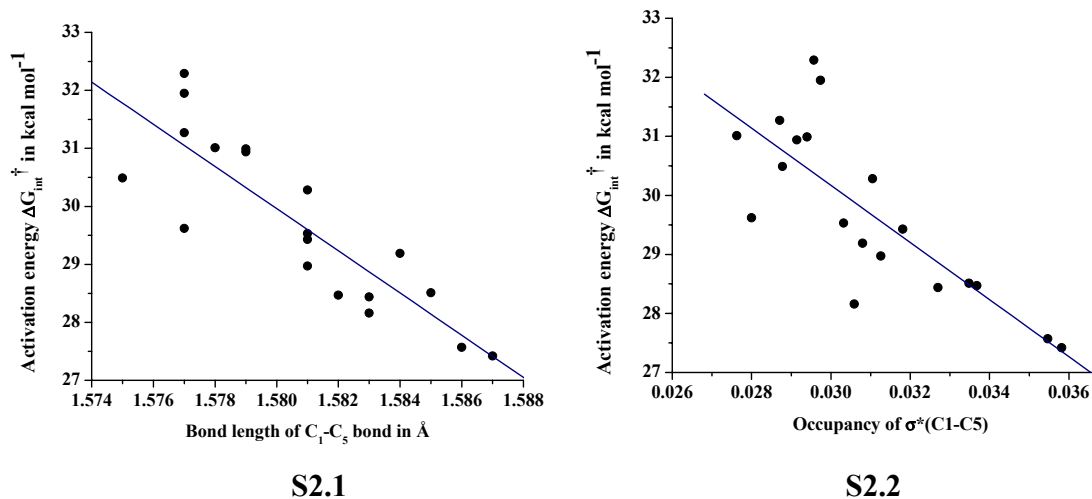

**Figure S2.** Correlation between computed intrinsic activation barrier (kcal mol $^{-1}$ ) and (i) bond length (S2.1) (ii) occupancies of C<sub>1</sub>-C<sub>5</sub> bond (S2.2)



**Table S6.** The B3LYP/6-31G\* optimized geometries (in Cartesian coordinates), total electronic energies (in hartree/particle), and number of imaginary frequencies (in  $cm^{-1}$ ) for cycloadducts and the corresponding transition states for cycloreversion reaction. The values in parenthesis implies single-point energies evaluated at the B3LYP/6-311+G\*\*//B3LYP/6-31G\* level.

| <b>1</b> Et = -984.2451822 (-984.4654879)<br>Nimag = 0 |           |           |           | <b>1<sup>†</sup></b> Et = -984.2060574 (-984.4295805)<br>Nimag = 1 (-469.51) |           |           |           |
|--------------------------------------------------------|-----------|-----------|-----------|------------------------------------------------------------------------------|-----------|-----------|-----------|
| 6                                                      | -0.990784 | .000013   | -.556512  | 6                                                                            | -0.987906 | -0.000033 | -0.494010 |
| 6                                                      | -.057447  | 1.126687  | -.028058  | 6                                                                            | -0.238833 | 1.142736  | 0.136146  |
| 6                                                      | .174460   | .670112   | 1.404179  | 6                                                                            | 0.188897  | 0.693605  | 1.413308  |
| 6                                                      | .174462   | -.670409  | 1.404071  | 6                                                                            | 0.188844  | -0.694089 | 1.413187  |
| 6                                                      | -.057453  | -1.126759 | -.028236  | 6                                                                            | -0.238965 | -1.142972 | 0.135972  |
| 6                                                      | 1.270380  | -.779300  | -.825907  | 14                                                                           | -2.885415 | 0.000023  | -0.070554 |
| 6                                                      | 2.487972  | -1.485379 | -.255023  | 6                                                                            | -3.627537 | 1.547323  | -0.871319 |
| 6                                                      | 3.621832  | -.672573  | .248145   | 6                                                                            | -3.245502 | -0.000173 | 1.783549  |
| 6                                                      | 3.621827  | .672580   | .248188   | 6                                                                            | -3.627676 | -1.547029 | -0.871674 |
| 6                                                      | 2.487956  | 1.485404  | -.254919  | 6                                                                            | 1.501923  | -0.710024 | -1.050518 |
| 6                                                      | 1.270362  | .779349   | -.825818  | 6                                                                            | 2.546208  | -1.460967 | -0.318313 |
| 14                                                     | -2.843814 | .000038   | -.070903  | 6                                                                            | 3.424547  | -0.672197 | 0.589021  |
| 1                                                      | -.993813  | .000117   | -1.659152 | 6                                                                            | 3.424475  | 0.672392  | 0.589057  |
| 1                                                      | -.364345  | 2.164300  | -1.165565 | 6                                                                            | 2.546056  | 1.461103  | -0.318246 |
| 1                                                      | .409985   | 1.330492  | 2.232451  | 6                                                                            | 1.501792  | 0.710083  | -1.050425 |
| 1                                                      | .409974   | -1.330927 | 2.232237  | 1                                                                            | -0.962708 | 0.000063  | -1.589071 |
| 1                                                      | -.364352  | -2.164357 | -1.165892 | 1                                                                            | -0.422267 | 2.186535  | -0.098426 |
| 1                                                      | 1.156239  | -1.160131 | -1.847741 | 1                                                                            | 0.583508  | 1.329930  | 2.197708  |
| 8                                                      | 2.540563  | -2.706568 | -.205314  | 1                                                                            | 0.583407  | -1.330583 | 2.197473  |
| 1                                                      | 4.463944  | -1.244209 | .631736   | 1                                                                            | -0.422445 | -2.186716 | -0.098810 |
| 1                                                      | 4.463936  | 1.244198  | .631813   | 1                                                                            | -3.414257 | 1.592279  | -1.946085 |
| 8                                                      | 2.540537  | 2.706591  | -.205146  | 1                                                                            | -3.239226 | 2.465820  | -0.415745 |
| 1                                                      | 1.156159  | 1.160291  | -1.847604 | 1                                                                            | -4.717977 | 1.557953  | -0.752689 |
| 6                                                      | -3.619736 | -1.546061 | -.849201  | 1                                                                            | -2.832241 | 0.883404  | 2.281253  |
| 6                                                      | -3.199320 | -.003202  | 1.788337  | 1                                                                            | -2.832457 | -0.883986 | 2.281015  |
| 6                                                      | -3.618494 | 1.549407  | -.843904  | 1                                                                            | -4.330485 | -0.000075 | 1.948525  |
| 1                                                      | -4.283680 | -.003288  | 1.958881  | 1                                                                            | -3.238391 | -2.465699 | -0.417278 |
| 1                                                      | -2.782811 | -.886885  | 2.283888  | 1                                                                            | -3.415597 | -1.591021 | -1.946719 |
| 1                                                      | -2.782348 | .878331   | 2.287277  | 1                                                                            | -4.717973 | -1.558294 | -0.751803 |
| 1                                                      | -4.703037 | -1.568458 | -.678386  | 1                                                                            | 1.110366  | -1.242835 | -1.912509 |
| 1                                                      | -3.456913 | -1.581269 | -1.933327 | 8                                                                            | 2.701116  | -2.673127 | -0.438505 |
| 1                                                      | -3.202523 | -2.466058 | -.421987  | 1                                                                            | 4.100520  | -1.253042 | 1.212068  |
| 1                                                      | -4.701457 | 1.573171  | -.671134  | 1                                                                            | 4.100387  | 1.253278  | 1.212132  |
| 1                                                      | -3.198995 | 2.467590  | -.415020  | 8                                                                            | 2.700830  | 2.673280  | -0.438411 |
| 1                                                      | -3.457472 | 1.587168  | -1.928211 | 1                                                                            | 1.110146  | 1.242898  | -1.912377 |

| <b>2</b> Et = -2651.750423 (-2653.9341535)<br>Nimag = 0 |           |           |           | <b>2<sup>†</sup></b> Et = -2651.709212 (-2653.89691)<br>Nimag = 1(-469.30) |           |           |           |
|---------------------------------------------------------|-----------|-----------|-----------|----------------------------------------------------------------------------|-----------|-----------|-----------|
| 6                                                       | -0.132165 | 0.670224  | 1.380891  | 6                                                                          | -1.226994 | -0.001261 | -0.553617 |
| 6                                                       | -0.327306 | 1.128059  | -0.057206 | 6                                                                          | -0.511522 | 1.144892  | 0.103436  |
| 6                                                       | 1.017182  | 0.780080  | -0.822447 | 6                                                                          | -0.121477 | 0.694090  | 1.390216  |
| 6                                                       | 1.017186  | -0.780098 | -0.822427 | 6                                                                          | -0.121713 | -0.694994 | 1.390898  |
| 6                                                       | -0.327311 | -1.128069 | -0.057195 | 6                                                                          | -0.512554 | -1.146947 | 0.104987  |
| 6                                                       | -0.132170 | -0.670216 | 1.380899  | 6                                                                          | 1.263059  | -0.709052 | -1.048914 |
| 6                                                       | 2.222122  | 1.485803  | -0.222288 | 6                                                                          | 2.286120  | -1.460636 | -0.285488 |
| 6                                                       | 3.352133  | 0.672636  | 0.287867  | 6                                                                          | 3.138952  | -0.671492 | 0.644923  |
| 6                                                       | 3.352142  | -0.672605 | 0.287874  | 6                                                                          | 3.138325  | 0.673205  | 0.645087  |
| 6                                                       | 2.222107  | -1.485793 | -0.222197 | 6                                                                          | 2.284469  | 1.461566  | -0.284929 |
| 6                                                       | -1.235907 | -0.000009 | -0.609797 | 6                                                                          | 1.261630  | 0.708968  | -1.048267 |
| 8                                                       | 2.265481  | -2.706088 | -0.156936 | 1                                                                          | -1.205096 | -0.002066 | -1.645668 |
| 8                                                       | 2.265409  | 2.706095  | -0.156902 | 1                                                                          | -0.704752 | 2.185575  | -0.136546 |
| 32                                                      | -3.105168 | -0.000004 | -0.028248 | 1                                                                          | 0.241489  | 1.331452  | 2.188353  |
| 1                                                       | -1.246096 | -0.000015 | -1.708664 | 1                                                                          | 0.241070  | -1.331678 | 2.189660  |
| 1                                                       | -0.645408 | 2.161118  | -0.201668 | 1                                                                          | -0.705073 | -2.187837 | -0.134599 |
| 1                                                       | 0.078381  | 1.332141  | 2.214014  | 1                                                                          | 0.889707  | -1.243813 | -1.917729 |
| 1                                                       | 0.078374  | -1.332123 | 2.214029  | 8                                                                          | 2.442559  | -2.672190 | -0.402246 |
| 1                                                       | -0.645419 | -2.161128 | -0.201647 | 1                                                                          | 3.798003  | -1.251915 | 1.286070  |
| 1                                                       | 0.929430  | -1.159414 | -1.847494 | 1                                                                          | 3.796829  | 1.254147  | 1.286323  |
| 1                                                       | 4.189534  | -1.243951 | 0.681897  | 8                                                                          | 2.439599  | 2.673206  | -0.401934 |
| 1                                                       | 4.189513  | 1.243997  | 0.681893  | 1                                                                          | 0.888674  | 1.243439  | -1.917472 |
| 1                                                       | 0.929384  | 1.159372  | -1.847518 | 32                                                                         | -3.144148 | 0.000101  | -0.041068 |
| 1                                                       | -3.809503 | -1.251464 | -0.608318 | 1                                                                          | -3.315588 | 0.000352  | 1.488961  |
| 1                                                       | -3.288454 | 0.000137  | 1.502801  | 1                                                                          | -3.820607 | -1.253157 | -0.644715 |
| 1                                                       | -3.809555 | 1.251319  | -0.608549 | 1                                                                          | -3.818955 | 1.254112  | -0.645015 |

| <b>3</b> Et = -601.0034415(-601.165081)<br>Nimag = 0 |           |           |           | <b>3<sup>†</sup></b> Et = -600.9612899 (-601.1255111)<br>Nimag = 1(-483.23) |           |           |           |
|------------------------------------------------------|-----------|-----------|-----------|-----------------------------------------------------------------------------|-----------|-----------|-----------|
| 6                                                    | 1.088201  | -0.671562 | 1.349858  | 6                                                                           | -2.153327 | -.138778  | -.626126  |
| 6                                                    | 1.238846  | -1.129772 | -0.096015 | 6                                                                           | -1.511112 | 1.046927  | .072285   |
| 6                                                    | -0.117759 | -0.780214 | -0.830498 | 6                                                                           | -1.134000 | .591741   | 1.366296  |
| 6                                                    | -0.117593 | 0.779937  | -0.830799 | 6                                                                           | -1.039431 | -.790741  | 1.339922  |
| 6                                                    | 1.239169  | 1.129511  | -0.096640 | 6                                                                           | -1.362184 | -1.240281 | .032340   |
| 6                                                    | 1.088386  | 0.672116  | 1.349504  | 6                                                                           | .386186   | -.696127  | -1.053934 |
| 6                                                    | -1.311699 | -1.485761 | -0.209241 | 6                                                                           | 1.438545  | -1.396011 | -.276489  |
| 6                                                    | -2.429719 | -0.672354 | 0.326633  | 6                                                                           | 2.228814  | -.569395  | .676081   |
| 6                                                    | -2.429565 | 0.672925  | 0.326436  | 6                                                                           | 2.154566  | .773263   | .685020   |
| 6                                                    | -1.311248 | 1.485924  | -0.209446 | 6                                                                           | 1.276573  | 1.521139  | -.255584  |
| 6                                                    | 2.160521  | -0.000410 | -0.629411 | 6                                                                           | .316864   | .720616   | -1.049793 |
| 8                                                    | -1.356223 | 2.706528  | -0.146770 | 5                                                                           | -3.648924 | -.004139  | -.119623  |
| 8                                                    | -1.357226 | -2.706358 | -0.146800 | 1                                                                           | -2.091049 | -1.102931 | -1.715617 |
| 5                                                    | 3.636771  | -0.000492 | -0.087660 | 1                                                                           | -1.745178 | 2.081946  | -.155951  |

|   |           |           |           |   |           |           |           |
|---|-----------|-----------|-----------|---|-----------|-----------|-----------|
| 1 | 2.212758  | -0.000690 | -1.735185 | 1 | -0.828946 | 1.235300  | 2.184109  |
| 1 | 1.554098  | -2.162455 | -0.247507 | 1 | -0.665074 | -1.418110 | 2.140803  |
| 1 | 0.892978  | -1.329706 | 2.190294  | 1 | -1.482389 | -2.289653 | -2.19190  |
| 1 | 0.893298  | 1.330771  | 2.189569  | 1 | .072974   | -1.239507 | -1.941202 |
| 1 | 1.554727  | 2.162019  | -0.248669 | 8 | 1.662056  | -2.595761 | -.398904  |
| 1 | -0.050202 | 1.158184  | -1.858061 | 1 | 2.905016  | -1.118146 | 1.327121  |
| 1 | -3.258667 | 1.244473  | 0.737434  | 1 | 2.766983  | 1.384229  | 1.343759  |
| 1 | -3.258964 | -1.243589 | 0.737776  | 8 | 1.362922  | 2.741517  | -.355639  |
| 1 | -0.050128 | -1.158888 | -1.857584 | 1 | -.069645  | 1.241382  | -1.920991 |
| 1 | 4.224456  | 1.028116  | 0.088006  | 1 | -4.443017 | .555410   | -.817961  |
| 1 | 4.224155  | -1.029178 | 0.088500  | 1 | -3.983843 | -.409392  | .949462   |

| <b>4</b> Et = -917.5145057 ( <b>-917.6999361</b> )<br>Nimag = 0 |           |           |           | <b>4<sup>†</sup></b> Et = -917.4697174 ( <b>-917.658433</b> )<br>Nimag = 1(-451.25) |           |           |           |
|-----------------------------------------------------------------|-----------|-----------|-----------|-------------------------------------------------------------------------------------|-----------|-----------|-----------|
| 6                                                               | -1.776682 | -0.008789 | -0.596146 | 6                                                                                   | -1.770824 | -0.002901 | -0.528499 |
| 6                                                               | -0.870381 | 1.121254  | -0.037898 | 6                                                                                   | -1.050472 | 1.146283  | 0.136492  |
| 6                                                               | -0.664171 | 0.654287  | 1.395416  | 6                                                                                   | -0.655058 | 0.694392  | 1.413775  |
| 6                                                               | -0.659489 | -0.685972 | 1.388886  | 6                                                                                   | -0.656191 | -0.699211 | 1.414727  |
| 6                                                               | -0.859654 | -1.138240 | -0.050744 | 6                                                                                   | -1.054422 | -1.152238 | 0.139368  |
| 6                                                               | 0.476923  | -0.778292 | -0.819180 | 6                                                                                   | 0.721283  | -0.707087 | -1.059504 |
| 6                                                               | 1.688889  | -1.478784 | -0.225790 | 6                                                                                   | 1.742393  | -1.459697 | -0.294868 |
| 6                                                               | 2.822838  | -0.660359 | 0.266444  | 6                                                                                   | 2.593411  | -0.669950 | 0.636285  |
| 6                                                               | 2.815630  | 0.684931  | 0.269902  | 6                                                                                   | 2.591520  | 0.674993  | 0.636901  |
| 6                                                               | 1.674011  | 1.493697  | -0.220659 | 6                                                                                   | 1.737858  | 1.462555  | -0.293366 |
| 6                                                               | 0.468522  | 0.782890  | -0.813845 | 6                                                                                   | 0.716920  | 0.707168  | -1.057146 |
| 15                                                              | -3.590146 | -0.103832 | -0.101749 | 15                                                                                  | -3.610321 | 0.001117  | 0.012692  |
| 1                                                               | -1.784995 | -0.011464 | -1.694934 | 1                                                                                   | -1.730095 | -0.004397 | -1.617276 |
| 1                                                               | -1.193199 | 2.153215  | -0.177319 | 1                                                                                   | -1.235969 | 2.187650  | -0.105730 |
| 1                                                               | -0.458986 | 1.311774  | 2.233409  | 1                                                                                   | -0.293067 | 1.328599  | 2.214929  |
| 1                                                               | -0.448832 | -1.351133 | 2.219434  | 1                                                                                   | -0.295040 | -1.332901 | 2.216681  |
| 1                                                               | -1.172195 | -2.171556 | -0.202915 | 1                                                                                   | -1.238257 | -2.193638 | -0.103671 |
| 1                                                               | 0.389165  | -1.153481 | -1.846001 | 1                                                                                   | 0.330993  | -1.245902 | -1.918178 |
| 8                                                               | 1.735274  | -2.698420 | -0.154207 | 8                                                                                   | 1.899500  | -2.670813 | -0.413621 |
| 1                                                               | 3.669234  | -1.227943 | 0.646410  | 1                                                                                   | 3.253376  | -1.249653 | 1.277078  |
| 1                                                               | 3.655977  | 1.259614  | 0.652647  | 1                                                                                   | 3.249805  | 1.256144  | 1.278102  |
| 8                                                               | 1.709281  | 2.713794  | -0.147717 | 8                                                                                   | 1.890784  | 2.674025  | -0.412171 |
| 1                                                               | 0.372351  | 1.164235  | -1.837592 | 1                                                                                   | 0.326532  | 1.245224  | -1.916304 |
| 1                                                               | -3.475856 | 0.369698  | 1.233396  | 1                                                                                   | -4.015362 | 1.030919  | -0.889069 |
| 1                                                               | -3.955533 | 1.171785  | -0.623223 | 1                                                                                   | -4.018887 | -1.030325 | -0.885585 |

| <b>5</b> Et = -732.8242492 ( <b>-733.0231861</b> )<br>Nimag = 0 |          |           |          | <b>5<sup>†</sup></b> Et = -732.7783793 ( <b>-732.9805611</b> )<br>Nimag = 1(-440.44) |           |          |          |
|-----------------------------------------------------------------|----------|-----------|----------|--------------------------------------------------------------------------------------|-----------|----------|----------|
| 6                                                               | -.945454 | -.780785  | -.796388 | 6                                                                                    | -1.295422 | -.000064 | -.387897 |
| 6                                                               | .350654  | -1.127573 | .045795  | 6                                                                                    | -.522560  | 1.148476 | .244852  |
| 6                                                               | 1.291538 | .000021   | -.475777 | 6                                                                                    | -.046560  | .698591  | 1.488253 |
| 6                                                               | .350633  | 1.127629  | .045747  | 6                                                                                    | -.046734  | -.699940 | 1.487873 |

|   |           |           |           |   |           |           |           |
|---|-----------|-----------|-----------|---|-----------|-----------|-----------|
| 6 | -.945457  | .780784   | -.796423  | 6 | -.522866  | -1.149075 | .244290   |
| 6 | .063717   | .669851   | 1.466028  | 6 | -2.853963 | .000024   | -.116307  |
| 6 | .063699   | -.669745  | 1.466056  | 6 | -3.243021 | -.001422  | 1.372032  |
| 6 | -2.182335 | -1.486066 | -.266186  | 6 | -3.452352 | -1.251886 | -.792182  |
| 6 | -3.340856 | -.672644  | .175210   | 6 | -3.451827 | 1.253586  | -.789569  |
| 6 | -3.340836 | .672598   | .175257   | 6 | 1.187811  | -.706692  | -1.053955 |
| 6 | -2.182342 | 1.486041  | -.266172  | 6 | 2.242553  | -1.460983 | -.341485  |
| 8 | -2.231463 | 2.706561  | -.203553  | 6 | 3.133325  | -.672255  | .552817   |
| 8 | -2.231416 | -2.706586 | -.203545  | 6 | 3.133068  | .672900   | .552908   |
| 6 | 2.804788  | -.000028  | -.114422  | 6 | 2.241998  | 1.461390  | -.341307  |
| 1 | 1.268645  | .000029   | -1.575709 | 6 | 1.187399  | .706782   | -1.053712 |
| 1 | .661649   | -2.164801 | -.080835  | 1 | -1.212357 | .000251   | -1.477869 |
| 1 | -.194526  | -1.330879 | 2.286857  | 1 | -.700889  | 2.192998  | .013595   |
| 1 | -.194481  | 1.331017  | 2.286807  | 1 | .376876   | 1.329635  | 2.262116  |
| 1 | .661664   | 2.164841  | -.080942  | 1 | .376573   | -1.331507 | 2.261374  |
| 1 | -.801928  | 1.159492  | -1.815589 | 1 | -.701260  | -2.193445 | .012426   |
| 1 | -4.201208 | 1.243826  | .516653   | 1 | -2.864049 | .881564   | 1.895914  |
| 1 | -4.201255 | -1.243864 | .516551   | 1 | -2.865313 | -.886188  | 1.893833  |
| 1 | -.801836  | -1.159540 | -1.815524 | 1 | -4.336056 | -.000749  | 1.462707  |
| 6 | 3.442465  | 1.252829  | -.755784  | 1 | -3.100341 | -2.175880 | -.320586  |
| 6 | 3.144109  | -.000228  | 1.389113  | 1 | -4.545931 | -1.238210 | -.715208  |
| 6 | 3.442458  | -1.252635 | -.756091  | 1 | -3.195389 | -1.295982 | -1.857781 |
| 1 | 4.528964  | -1.247997 | -.609075  | 1 | -3.193265 | 1.300817  | -1.854647 |
| 1 | 3.053374  | -2.176415 | -.313104  | 1 | -3.100881 | 2.176360  | -.314803  |
| 1 | 3.253320  | -1.291216 | -1.836093 | 1 | -4.545514 | 1.239263  | -.714282  |
| 1 | 4.234721  | -.000280  | 1.512106  | 1 | .746980   | -1.246616 | -1.886903 |
| 1 | 2.749886  | .882042   | 1.903110  | 8 | 2.396048  | -2.672309 | -.468949  |
| 1 | 2.749772  | -.882593  | 1.902855  | 1 | 3.820539  | -1.252417 | 1.164068  |
| 1 | 4.528989  | 1.248067  | -.608926  | 1 | 3.820060  | 1.253248  | 1.164230  |
| 1 | 3.253138  | 1.291739  | -1.835736 | 8 | 2.395061  | 2.672766  | -.468713  |
| 1 | 3.053453  | 2.176444  | -.312408  | 1 | .746254   | 1.246617  | -1.886554 |

| <b>6</b> Et = -688.8884332 (-689.0807532)<br>Nimag = 0 |           |           |           | <b>6<sup>†</sup></b> Et = -688.8424493 (-689.0378774)<br>Nimag = 1(-451.21) |           |           |           |
|--------------------------------------------------------|-----------|-----------|-----------|-----------------------------------------------------------------------------|-----------|-----------|-----------|
| 6                                                      | 0.635472  | -0.670027 | 1.485071  | 6                                                                           | -1.851443 | -0.000284 | -0.390784 |
| 6                                                      | 0.909837  | -1.130081 | 0.060062  | 6                                                                           | -1.089415 | 1.151540  | 0.232175  |
| 6                                                      | -0.377837 | -0.779813 | -0.788044 | 6                                                                           | -0.646901 | 0.697968  | 1.492562  |
| 6                                                      | -0.377829 | 0.779811  | -0.788044 | 6                                                                           | -0.647323 | -0.698275 | 1.492863  |
| 6                                                      | 0.909850  | 1.130067  | 0.060062  | 6                                                                           | -1.090442 | -1.152180 | 0.232918  |
| 6                                                      | 0.635490  | 0.670016  | 1.485073  | 6                                                                           | 0.617252  | -0.706113 | -1.055554 |
| 6                                                      | -1.618954 | -1.485975 | -0.263406 | 6                                                                           | 1.672577  | -1.460867 | -0.337414 |
| 6                                                      | -2.794587 | -0.672707 | 0.129020  | 6                                                                           | 2.568240  | -0.672215 | 0.551309  |
| 6                                                      | -2.794579 | 0.672731  | 0.129022  | 6                                                                           | 2.568001  | 0.672848  | 0.551352  |
| 6                                                      | -1.618941 | 1.485987  | -0.263414 | 6                                                                           | 1.671973  | 1.461127  | -0.337279 |
| 6                                                      | 1.855846  | -0.000013 | -0.446641 | 6                                                                           | 0.616571  | 0.705912  | -1.055161 |
| 8                                                      | -1.652471 | 2.703883  | -0.166883 | 6                                                                           | -3.297586 | 0.000518  | 0.144439  |

|   |           |           |           |   |           |           |           |
|---|-----------|-----------|-----------|---|-----------|-----------|-----------|
| 8 | -1.652504 | -2.703872 | -0.166894 | 1 | -1.913978 | -0.000519 | -1.478828 |
| 6 | 3.251599  | -0.000011 | 0.137503  | 1 | -1.291702 | 2.191718  | -0.000995 |
| 8 | 4.250460  | 0.000010  | -0.550854 | 1 | -0.245711 | 1.329646  | 2.277271  |
| 1 | 1.964925  | -0.000010 | -1.536464 | 1 | -0.246505 | -1.329882 | 2.277816  |
| 1 | 1.236637  | -2.162119 | -0.069218 | 1 | -1.292548 | -2.192397 | -0.000147 |
| 1 | 0.382782  | -1.332086 | 2.306248  | 1 | 0.179379  | -1.245638 | -1.890498 |
| 1 | 0.382816  | 1.332079  | 2.306251  | 8 | 1.817568  | -2.672403 | -0.460089 |
| 1 | 1.236663  | 2.162100  | -0.069220 | 1 | 3.256866  | -1.252589 | 1.160482  |
| 1 | -0.227320 | 1.157416  | -1.806562 | 1 | 3.256426  | 1.253459  | 1.160525  |
| 1 | -3.664339 | 1.243736  | 0.445581  | 8 | 1.816325  | 2.672695  | -0.460031 |
| 1 | -3.664354 | -1.243702 | 0.445577  | 1 | 0.178610  | 1.245282  | -1.890163 |
| 1 | -0.227334 | -1.157420 | -1.806562 | 8 | -4.264292 | -0.000321 | -0.579080 |
| 1 | 3.323447  | -0.000069 | 1.243829  | 1 | -3.386672 | 0.001279  | 1.249568  |

| 7 Et = -575.57696 (-575.7339514)<br>Nimag = 0 |           |           |           | 7 <sup>†</sup> Et = -575.529184 (-575.6901174)<br>Nimag = 1(-439.42) |           |           |           |
|-----------------------------------------------|-----------|-----------|-----------|----------------------------------------------------------------------|-----------|-----------|-----------|
| 6                                             | 2.391678  | -0.000223 | -.652924  | 6                                                                    | 2.385943  | -0.007161 | -.659164  |
| 6                                             | 1.495100  | -1.129374 | -.095085  | 6                                                                    | 1.700272  | -1.158147 | .042641   |
| 6                                             | 1.347257  | -.670560  | 1.348578  | 6                                                                    | 1.374541  | -.701341  | 1.331609  |
| 6                                             | 1.347425  | .670513   | 1.348519  | 6                                                                    | 1.380832  | .698130   | 1.331008  |
| 6                                             | 1.495314  | 1.129150  | -.095192  | 6                                                                    | 1.712759  | 1.150679  | .042659   |
| 6                                             | .137407   | .779934   | -.830166  | 6                                                                    | -.138606  | .705047   | -1.077717 |
| 6                                             | -1.054374 | 1.486200  | -.206689  | 6                                                                    | -1.109050 | 1.463226  | -.256900  |
| 6                                             | -2.174245 | .672792   | .325075   | 6                                                                    | -1.908832 | .676778   | .721614   |
| 6                                             | -2.174339 | -.672493  | .325089   | 6                                                                    | -1.911753 | -.668160  | .722213   |
| 6                                             | -1.054648 | -1.486071 | -.206792  | 6                                                                    | -1.115353 | -1.458493 | -.255761  |
| 6                                             | .137292   | -.779980  | -.830159  | 6                                                                    | -.139655  | -.704920  | -1.075673 |
| 1                                             | 3.390930  | -0.000297 | -.207602  | 1                                                                    | 3.450833  | -.013301  | -.373178  |
| 1                                             | 2.474276  | -0.000284 | -1.746665 | 1                                                                    | 2.331935  | -0.006782 | -1.749232 |
| 1                                             | 1.805853  | -2.162876 | -.250662  | 1                                                                    | 1.862842  | -2.200390 | -.210067  |
| 1                                             | 1.169149  | -1.330750 | 2.190972  | 1                                                                    | 1.044413  | -1.329024 | 2.151986  |
| 1                                             | 1.169467  | 1.330824  | 2.190849  | 1                                                                    | 1.055963  | 1.329558  | 2.150638  |
| 1                                             | 1.806253  | 2.162579  | -.250879  | 1                                                                    | 1.881757  | 2.191145  | -.212856  |
| 1                                             | .203537   | 1.157613  | -1.857799 | 1                                                                    | .223437   | 1.245629  | -1.947383 |
| 8                                             | -1.098389 | 2.706669  | -.141320  | 8                                                                    | -1.268766 | 2.675157  | -.366819  |
| 1                                             | -3.004395 | 1.244083  | .734282   | 1                                                                    | -2.529244 | 1.258976  | 1.398717  |
| 1                                             | -3.004563 | -1.243658 | .734321   | 1                                                                    | -2.534711 | -1.247165 | 1.399707  |
| 8                                             | -1.098756 | -2.706528 | -.141250  | 8                                                                    | -1.280436 | -2.669534 | -.365965  |
| 1                                             | .203452   | -1.157692 | -1.857776 | 1                                                                    | .219805   | -1.247463 | -1.945233 |

| 8 Et = -654.2037292 (-654.3817009)<br>Nimag = 0 |          |           |          | 8 <sup>†</sup> Et = -654.155253 (-654.3366516)<br>Nimag = 1(-439.42) |          |           |           |
|-------------------------------------------------|----------|-----------|----------|----------------------------------------------------------------------|----------|-----------|-----------|
| 6                                               | 1.755195 | -.346844  | -.451230 | 6                                                                    | 1.767160 | -0.327588 | -0.344881 |
| 6                                               | .649948  | -1.333597 | .020305  | 6                                                                    | 0.831188 | -1.383953 | 0.218827  |
| 6                                               | .439893  | -.879628  | 1.457431 | 6                                                                    | 0.410591 | -0.928975 | 1.479448  |

|   |           |           |           |   |           |           |           |
|---|-----------|-----------|-----------|---|-----------|-----------|-----------|
| 6 | .639003   | .445393   | 1.494429  | 6 | 0.609087  | 0.455653  | 1.545799  |
| 6 | .984122   | .896049   | .082846   | 6 | 1.160754  | 0.891739  | 0.330550  |
| 6 | -.344380  | .766431   | -.765945  | 6 | -0.585343 | 0.747244  | -1.021310 |
| 6 | -1.466076 | 1.631859  | -.216841  | 6 | -1.531191 | 1.614257  | -0.285591 |
| 6 | -2.736684 | .987399   | .193509   | 6 | -2.541407 | 0.924405  | 0.562701  |
| 6 | -2.936569 | -.342260  | .152442   | 6 | -2.730752 | -0.406093 | 0.505914  |
| 6 | -1.907218 | -1.305953 | -.306592  | 6 | -1.943299 | -1.275701 | -0.409904 |
| 6 | -.574757  | -.776777  | -.810388  | 6 | -0.782164 | -0.648010 | -1.080282 |
| 1 | 1.807217  | -.322571  | -1.549835 | 1 | 1.750020  | -0.270571 | -1.436766 |
| 1 | .817407   | -2.400485 | -.136076  | 1 | 0.882339  | -2.432112 | -0.058802 |
| 1 | .093507   | -1.518761 | 2.262914  | 1 | -0.100738 | -1.529274 | 2.223947  |
| 1 | .489733   | 1.112661  | 2.336888  | 1 | 0.274882  | 1.102375  | 2.349715  |
| 1 | 1.449790  | 1.877106  | -.016760  | 1 | 1.489949  | 1.908840  | 0.146973  |
| 1 | -1.141651 | 1.146869  | -1.774520 | 1 | -0.048225 | 1.253348  | -1.818045 |
| 8 | -1.332527 | 2.843257  | -.114099  | 8 | -1.508222 | 2.839309  | -0.361639 |
| 1 | -3.505539 | 1.670018  | .548409   | 1 | -3.150387 | 1.571101  | 1.189821  |
| 1 | -3.875214 | -.788960  | .472575   | 1 | -3.503231 | -0.907924 | 1.083704  |
| 8 | -2.136796 | -2.506907 | -.278991  | 8 | -2.261508 | -2.447256 | -0.590516 |
| 1 | -.480507  | -1.142609 | -1.840095 | 1 | -0.402723 | -1.212610 | -1.927007 |
| 6 | 3.167683  | -.590980  | .088081   | 6 | 3.242150  | -0.583403 | 0.077652  |
| 1 | 3.147980  | -.632928  | 1.182503  | 1 | 3.302635  | -0.641414 | 1.169804  |
| 1 | 3.497338  | -1.581737 | -.254708  | 1 | 3.537519  | -1.567697 | -0.308703 |
| 6 | 4.181935  | .463020   | -.373045  | 6 | 4.213280  | 0.477379  | -0.451392 |
| 1 | 5.188596  | .221405   | -.014211  | 1 | 5.244858  | 0.225765  | -0.181498 |
| 1 | 4.225698  | .524672   | -1.467675 | 1 | 4.165920  | 0.554292  | -1.544537 |
| 1 | 3.927672  | 1.459860  | .005296   | 1 | 3.994696  | 1.467736  | -0.036546 |

| <b>9</b> Et = -614.8907833 (-615.0581986)<br>Nimag = 0 |           |           |           | <b>9<sup>†</sup></b> Et = -614.8419005 (-615.0127482)<br>Nimag = 1(-434.76) |           |           |           |
|--------------------------------------------------------|-----------|-----------|-----------|-----------------------------------------------------------------------------|-----------|-----------|-----------|
| 6                                                      | -.164427  | -.780808  | -.815123  | 6                                                                           | -2.099703 | -0.002459 | -0.536122 |
| 6                                                      | 1.174410  | -1.127683 | -.048838  | 6                                                                           | -1.369117 | 1.149366  | 0.134992  |
| 6                                                      | 2.090287  | -.000142  | -.603801  | 6                                                                           | -0.974222 | 0.700030  | 1.405266  |
| 6                                                      | 1.174609  | 1.127648  | -.049059  | 6                                                                           | -0.975208 | -0.700794 | 1.407368  |
| 6                                                      | -.164387  | .780735   | -.815139  | 6                                                                           | -1.372828 | -1.153418 | 0.139724  |
| 6                                                      | .980120   | .670399   | 1.389015  | 6                                                                           | -3.613687 | 0.000643  | -0.210740 |
| 6                                                      | .979541   | -.670066  | 1.389088  | 6                                                                           | 0.424642  | -0.705293 | -1.069559 |
| 6                                                      | -1.371939 | -1.486294 | -.220964  | 6                                                                           | 1.431336  | -1.460063 | -0.291069 |
| 6                                                      | -2.506793 | -.672571  | .277640   | 6                                                                           | 2.264537  | -0.670958 | 0.656798  |
| 6                                                      | -2.506726 | .672692   | .277677   | 6                                                                           | 2.263205  | 0.674114  | 0.657321  |
| 6                                                      | -1.371840 | 1.486325  | -.220997  | 6                                                                           | 1.428306  | 1.461631  | -0.290056 |
| 8                                                      | -1.416791 | 2.706665  | -.153896  | 6                                                                           | 0.421214  | 0.704954  | -1.067718 |
| 8                                                      | -1.416951 | -2.706626 | -.153768  | 1                                                                           | -1.996064 | -0.004907 | -1.623936 |
| 6                                                      | 3.543990  | -.000219  | -.136607  | 1                                                                           | -1.549492 | 2.191533  | -0.108999 |
| 1                                                      | 2.076046  | -.000222  | -1.702892 | 1                                                                           | -0.607681 | 1.331369  | 2.207232  |
| 1                                                      | 1.490164  | -2.161903 | -.194633  | 1                                                                           | -0.609345 | -1.330210 | 2.211166  |

|   |           |           |           |   |           |           |           |
|---|-----------|-----------|-----------|---|-----------|-----------|-----------|
| 1 | .778798   | -1.330735 | 2.225999  | 1 | -1.551903 | -2.196060 | -0.102963 |
| 1 | .779842   | 1.331320  | 2.225836  | 1 | -4.093538 | 0.884912  | -0.644316 |
| 1 | 1.490488  | 2.161788  | -.195155  | 1 | -3.790401 | 0.003815  | 0.868121  |
| 1 | -.075606  | 1.157431  | -1.841464 | 1 | -4.096159 | -0.884529 | -0.639520 |
| 1 | -3.348583 | 1.243890  | .662475   | 1 | 0.025745  | -1.247576 | -1.921846 |
| 1 | -3.348704 | -1.243703 | .662416   | 8 | 1.593778  | -2.670884 | -0.410449 |
| 1 | -.075581  | -1.157578 | -1.841419 | 1 | 2.913091  | -1.250886 | 1.309064  |
| 1 | 4.069886  | .884016   | -.515696  | 1 | 2.910550  | 1.255000  | 1.309930  |
| 1 | 3.622325  | -.000223  | .954201   | 8 | 1.587584  | 2.672686  | -0.409574 |
| 1 | 4.069790  | -.884506  | -.515705  | 1 | 0.023454  | 1.246610  | -1.920990 |

| <b>10</b> Et = -973.759503 (-973.9460691)<br>Nimag = 0 |           |           |           | <b>10<sup>†</sup></b> Et = -973.7095899(-973.8998407)<br>Nimag = 1(-435.96) |           |           |           |
|--------------------------------------------------------|-----------|-----------|-----------|-----------------------------------------------------------------------------|-----------|-----------|-----------|
| 6                                                      | 0.681678  | -0.670746 | 1.388589  | 6                                                                           | -1.774383 | -0.000139 | -0.501584 |
| 6                                                      | 0.875960  | -1.132968 | -0.047896 | 6                                                                           | -1.063468 | 1.156712  | 0.170852  |
| 6                                                      | -0.461286 | -0.781509 | -0.815575 | 6                                                                           | -0.650082 | 0.701330  | 1.431823  |
| 6                                                      | -0.461253 | 0.781480  | -0.815626 | 6                                                                           | -0.650059 | -0.701610 | 1.431820  |
| 6                                                      | 0.875938  | 1.132910  | -0.047842 | 6                                                                           | -1.063694 | -1.157003 | 0.170988  |
| 6                                                      | 0.681606  | 0.670596  | 1.388614  | 6                                                                           | 0.712196  | -0.705568 | -1.068657 |
| 6                                                      | -1.669143 | -1.486811 | -0.218681 | 6                                                                           | 1.728414  | -1.461756 | -0.300317 |
| 6                                                      | -2.811135 | -0.672673 | 0.260818  | 6                                                                           | 2.572626  | -0.672492 | 0.636481  |
| 6                                                      | -2.811107 | 0.672810  | 0.260779  | 6                                                                           | 2.572454  | 0.672934  | 0.636486  |
| 6                                                      | -1.669159 | 1.486878  | -0.218946 | 6                                                                           | 1.728031  | 1.461957  | -0.300302 |
| 6                                                      | 1.777080  | -0.000006 | -0.606131 | 6                                                                           | 0.711860  | 0.705473  | -1.068587 |
| 8                                                      | -1.705141 | 2.705934  | -0.136194 | 16                                                                          | -3.615079 | -0.000065 | -.203296  |
| 8                                                      | -1.705406 | -2.705886 | -0.136347 | 1                                                                           | -1.721430 | -0.000169 | -1.590086 |
| 16                                                     | 3.547657  | 0.000000  | -0.133262 | 1                                                                           | -1.259667 | 2.193204  | -0.078151 |
| 1                                                      | 1.806158  | 0.000022  | -1.701441 | 1                                                                           | -0.276854 | 1.331291  | 2.231230  |
| 1                                                      | 1.203345  | -2.161015 | -0.197964 | 1                                                                           | -0.276780 | -1.331560 | 2.231216  |
| 1                                                      | 0.482885  | -1.331646 | 2.225314  | 1                                                                           | -1.259719 | -2.193478 | -0.078177 |
| 1                                                      | 0.482762  | 1.331441  | 2.225370  | 1                                                                           | 0.303283  | -1.248642 | -1.915943 |
| 1                                                      | 1.203320  | 2.160968  | -0.197839 | 8                                                                           | 1.886734  | -2.671942 | -0.423190 |
| 1                                                      | -0.373421 | 1.158754  | -1.841712 | 1                                                                           | 3.229685  | -1.252120 | 1.280323  |
| 1                                                      | -3.657572 | 1.243566  | 0.635646  | 1                                                                           | 3.229366  | 1.252737  | 1.280322  |
| 1                                                      | -3.657635 | -1.243373 | 0.635689  | 8                                                                           | 1.885981  | 2.672172  | -0.423201 |
| 1                                                      | -0.373569 | -1.158836 | -1.841654 | 1                                                                           | 0.303239  | 1.248282  | -1.916204 |
| 1                                                      | 3.350508  | -0.000035 | 1.202510  | 1                                                                           | -3.554956 | 0.000620  | 1.145310  |

| <b>11</b> Et = -728.2134853 (-728.4159983)<br>Nimag = 0 |           |           |           | <b>11<sup>†</sup></b> Et = -728.1631777 (-728.3687799)<br>Nimag = 1(-433.71) |           |           |           |
|---------------------------------------------------------|-----------|-----------|-----------|------------------------------------------------------------------------------|-----------|-----------|-----------|
| 6                                                       | 0.448158  | -0.769621 | 1.342176  | 6                                                                            | 1.563112  | -0.073030 | -0.457419 |
| 6                                                       | 0.596041  | -1.186212 | -0.115396 | 6                                                                            | 0.752214  | -1.242913 | 0.049880  |
| 6                                                       | -0.733228 | -0.750660 | -0.849467 | 6                                                                            | 0.354349  | -0.917008 | 1.358165  |
| 6                                                       | -0.664399 | 0.808954  | -0.796889 | 6                                                                            | 0.430325  | 0.469863  | 1.521615  |
| 6                                                       | 0.691179  | 1.074091  | -0.031139 | 6                                                                            | 0.885846  | 1.044078  | 0.324195  |
| 6                                                       | 0.503222  | 0.568801  | 1.393575  | 6                                                                            | -0.897729 | 0.829431  | -0.992933 |

|   |           |           |           |   |           |           |           |
|---|-----------|-----------|-----------|---|-----------|-----------|-----------|
| 6 | -1.965663 | -1.419552 | -0.261629 | 6 | -1.887568 | 1.548126  | -0.163963 |
| 6 | -3.062777 | -0.571083 | 0.263406  | 6 | -2.789138 | 0.707572  | 0.670571  |
| 6 | -3.003600 | 0.772332  | 0.306406  | 6 | -2.852648 | -0.628626 | 0.528890  |
| 6 | -1.832071 | 1.548872  | -0.163170 | 6 | -2.027050 | -1.353835 | -0.474233 |
| 6 | 1.549186  | -0.080338 | -0.623119 | 6 | -0.953560 | -0.573229 | -1.136498 |
| 8 | -1.809639 | 2.765376  | -0.041200 | 6 | 3.064892  | -0.154259 | -0.047008 |
| 8 | -2.060983 | -2.637471 | -0.223288 | 1 | 1.534602  | 0.072546  | -1.540493 |
| 6 | 2.991522  | -0.203790 | -0.133409 | 1 | 0.900805  | -2.259425 | -0.297480 |
| 6 | 3.850391  | 1.045847  | -0.203277 | 1 | -0.060543 | -1.615119 | 2.076108  |
| 8 | 3.435097  | -1.265076 | 0.260173  | 1 | 0.072233  | 1.024949  | 2.381412  |
| 1 | 1.587416  | -0.024097 | -1.722765 | 1 | 1.126518  | 2.094780  | 0.203312  |
| 1 | 0.882339  | -2.219939 | -0.299093 | 1 | -0.442372 | 1.437697  | -1.769181 |
| 1 | 0.241241  | -1.454746 | 2.156842  | 8 | -1.982678 | 2.772296  | -0.152843 |
| 1 | 0.343175  | 1.205897  | 2.256777  | 1 | -3.429363 | 1.248232  | 1.363471  |
| 1 | 1.047212  | 2.098110  | -0.146820 | 1 | -3.547618 | -1.240836 | 1.098441  |
| 1 | -0.570297 | 1.216219  | -1.811264 | 8 | -2.241293 | -2.533779 | -0.730604 |
| 1 | -3.818291 | 1.367288  | 0.712854  | 1 | -0.564958 | -1.039684 | -2.037514 |
| 1 | -3.927979 | -1.116283 | 0.633613  | 8 | 3.478634  | -0.919802 | 0.794580  |
| 1 | -0.677801 | -1.094390 | -1.889692 | 6 | 3.981917  | 0.789522  | -0.805578 |
| 1 | 4.900886  | 0.779593  | -0.069585 | 1 | 4.967215  | 0.800669  | -0.335695 |
| 1 | 3.713640  | 1.577635  | -1.152408 | 1 | 4.085249  | 0.447139  | -1.843667 |
| 1 | 3.554896  | 1.736224  | 0.597649  | 1 | 3.571160  | 1.805189  | -0.841888 |

| <b>12</b> Et = -764.1400915 ( <b>-764.3625643</b> )<br>Nimag = 0 |           |           |           | <b>12<sup>†</sup></b> Et = -764.0885005 ( <b>-764.3140489</b> )<br>Nimag = 1(-433.36) |           |           |           |
|------------------------------------------------------------------|-----------|-----------|-----------|---------------------------------------------------------------------------------------|-----------|-----------|-----------|
| 6                                                                | 0.489528  | -0.731727 | 1.339216  | 6                                                                                     | 1.564270  | -0.064492 | -0.488028 |
| 6                                                                | 0.630528  | -1.163977 | -0.115018 | 6                                                                                     | 0.789374  | -1.236877 | 0.073321  |
| 6                                                                | -0.711886 | -0.762785 | -0.843130 | 6                                                                                     | 0.398335  | -0.875387 | 1.370676  |
| 6                                                                | -0.674355 | 0.799032  | -0.807163 | 6                                                                                     | 0.457991  | 0.519077  | 1.493871  |
| 6                                                                | 0.683309  | 1.100913  | -0.060263 | 6                                                                                     | 0.887075  | 1.067548  | 0.276305  |
| 6                                                                | 0.519998  | 0.608206  | 1.372023  | 6                                                                                     | -0.902078 | 0.801641  | -1.006513 |
| 6                                                                | -1.924420 | -1.452466 | -0.237584 | 6                                                                                     | -1.890937 | 1.528303  | -0.178828 |
| 6                                                                | -3.038985 | -0.622483 | 0.278718  | 6                                                                                     | -2.771844 | 0.696476  | 0.685328  |
| 6                                                                | -3.006823 | 0.722187  | 0.309024  | 6                                                                                     | -2.824305 | -0.642825 | 0.570707  |
| 6                                                                | -1.852229 | 1.519202  | -0.169280 | 6                                                                                     | -2.005963 | -1.380349 | -0.429266 |
| 6                                                                | 1.552354  | -0.042912 | -0.646804 | 6                                                                                     | -0.953246 | -0.602082 | -1.125212 |
| 8                                                                | -1.853943 | 2.736076  | -0.052582 | 6                                                                                     | 3.051875  | -0.117864 | -0.113620 |
| 8                                                                | -1.988031 | -2.671620 | -0.178654 | 1                                                                                     | 1.520279  | 0.049719  | -1.572952 |
| 6                                                                | 2.978770  | -0.128292 | -0.142494 | 1                                                                                     | 0.942650  | -2.259063 | -0.253050 |
| 8                                                                | 3.595058  | 1.079378  | -0.179266 | 1                                                                                     | -0.001671 | -1.556355 | 2.113158  |
| 8                                                                | 3.542984  | -1.139437 | 0.208846  | 1                                                                                     | 0.102907  | 1.091792  | 2.343256  |
| 1                                                                | 1.594418  | -0.005862 | -1.744777 | 1                                                                                     | 1.128862  | 2.112202  | 0.118713  |
| 1                                                                | 0.936370  | -2.193707 | -0.291272 | 1                                                                                     | -0.462659 | 1.398780  | -1.800480 |
| 1                                                                | 0.304462  | -1.410830 | 2.164023  | 8                                                                                     | -1.998839 | 2.750468  | -0.194077 |
| 1                                                                | 0.360668  | 1.254003  | 2.228593  | 1                                                                                     | -3.407819 | 1.244839  | 1.376030  |
| 1                                                                | 1.033767  | 2.123140  | -0.192949 | 1                                                                                     | -3.505447 | -1.249973 | 1.161959  |



|   |           |           |           |   |           |           |           |
|---|-----------|-----------|-----------|---|-----------|-----------|-----------|
| 1 | -0.600591 | 1.197020  | -1.826883 | 8 | -2.211235 | -2.567605 | -0.657607 |
| 1 | -3.832336 | 1.304116  | 0.712457  | 1 | -0.563210 | -1.085955 | -2.016228 |
| 1 | -3.891850 | -1.181728 | 0.656488  | 8 | 3.709437  | 0.906726  | -0.713035 |
| 1 | -0.658143 | -1.115804 | -1.880439 | 8 | 3.600440  | -0.930939 | 0.589917  |
| 1 | 4.509946  | 0.925091  | 0.124537  | 1 | 4.644404  | 0.825802  | -0.444446 |

| <b>13</b> Et = -1035.170332 (-1035.355123)<br>Nimag = 0 |           |           |           | <b>13<sup>†</sup></b> Et = -1035.118538 (-1035.3068541)<br>Nimag = 1(-418.34) |           |           |           |
|---------------------------------------------------------|-----------|-----------|-----------|-------------------------------------------------------------------------------|-----------|-----------|-----------|
| 6                                                       | -1.658277 | 1.487408  | -.213065  | 6                                                                             | -1.750644 | .000140   | -.511388  |
| 6                                                       | -.452735  | .782111   | -.816838  | 6                                                                             | -1.070123 | 1.160696  | .184009   |
| 6                                                       | -.452747  | -.782126  | -.816818  | 6                                                                             | -.670899  | .702259   | 1.442853  |
| 6                                                       | -1.658276 | -1.487386 | -.212977  | 6                                                                             | -.670971  | -.703253  | 1.442458  |
| 6                                                       | -2.805065 | -.672735  | .253354   | 6                                                                             | -1.070291 | -1.160915 | .183371   |
| 6                                                       | -2.805058 | .672784   | .253332   | 6                                                                             | .709756   | -.704398  | -1.080615 |
| 6                                                       | .885075   | 1.133382  | -.049896  | 6                                                                             | 1.717318  | -1.461935 | -.30036   |
| 6                                                       | 1.762001  | -.000005  | -.622786  | 6                                                                             | 2.550902  | -.672704  | .645344   |
| 6                                                       | .885079   | -1.133400 | -.049904  | 6                                                                             | 2.550840  | .672961   | .645341   |
| 6                                                       | .699594   | .669584   | 1.386865  | 6                                                                             | 1.717071  | 1.462155  | -.300259  |
| 6                                                       | .699608   | -.669617  | 1.386862  | 6                                                                             | .709588   | .704511   | -1.080516 |
| 17                                                      | 3.481174  | -.000005  | -.057198  | 17                                                                            | -3.557336 | .000103   | -.137589  |
| 8                                                       | -1.687800 | -2.705198 | -.118628  | 1                                                                             | -1.712939 | .000480   | -1.596507 |
| 8                                                       | -1.687706 | 2.705212  | -.118581  | 1                                                                             | -1.266707 | 2.195430  | -.069994  |
| 1                                                       | 1.816300  | -.000001  | -1.713553 | 1                                                                             | -.314058  | 1.330906  | 2.250427  |
| 1                                                       | 1.217622  | -2.158839 | -.205379  | 1                                                                             | -.314179  | -1.332404 | 2.249664  |
| 1                                                       | .515449   | -1.332978 | 2.224243  | 1                                                                             | -1.266916 | -2.195464 | -.071330  |
| 1                                                       | .515426   | 1.332937  | 2.224251  | 1                                                                             | .298961   | -1.249730 | -1.925561 |
| 1                                                       | 1.217618  | 2.158823  | -.205358  | 8                                                                             | 1.876025  | -2.671337 | -.424141  |
| 1                                                       | -.372616  | 1.158066  | -1.844144 | 1                                                                             | 3.201463  | -1.252086 | 1.295847  |
| 1                                                       | -3.654110 | 1.243282  | .622650   | 1                                                                             | 3.201395  | 1.252393  | 1.295804  |
| 1                                                       | -3.654125 | -1.243212 | .622684   | 8                                                                             | 1.875693  | 2.671570  | -.424013  |
| 1                                                       | -.372668  | -1.158107 | -1.844119 | 1                                                                             | .298671   | 1.249749  | -1.925479 |

| <b>14</b> Et = -630.9205428 (-631.101355)<br>Nimag = 0 |           |           |           | <b>14<sup>†</sup></b> Et = -630.8671985 (-631.0513755)<br>Nimag = 1(-418.15) |           |           |           |
|--------------------------------------------------------|-----------|-----------|-----------|------------------------------------------------------------------------------|-----------|-----------|-----------|
| 6                                                      | 1.377796  | -1.483467 | -0.208790 | 6                                                                            | 2.104605  | -0.011058 | -0.539761 |
| 6                                                      | 0.161341  | -0.793465 | -0.802560 | 6                                                                            | 1.375693  | -1.167088 | 0.137587  |
| 6                                                      | 0.149720  | 0.769314  | -0.825996 | 6                                                                            | 0.988219  | -0.721770 | 1.404135  |
| 6                                                      | 1.345800  | 1.489933  | -0.223983 | 6                                                                            | 0.992335  | 0.687542  | 1.417954  |
| 6                                                      | 2.489920  | 0.690285  | 0.275894  | 6                                                                            | 1.383231  | 1.148265  | 0.158122  |
| 6                                                      | 2.503376  | -0.654922 | 0.285321  | 6                                                                            | -0.420697 | 0.707049  | -1.080752 |
| 6                                                      | -1.166720 | -1.140377 | -0.025531 | 6                                                                            | -1.409023 | 1.469471  | -0.286112 |
| 6                                                      | -2.098712 | -0.024785 | -0.612943 | 6                                                                            | -2.233892 | 0.683550  | 0.670917  |
| 6                                                      | -1.196858 | 1.121619  | -0.083790 | 6                                                                            | -2.242483 | -0.661843 | 0.667334  |
| 6                                                      | -0.994530 | -0.643748 | 1.399833  | 6                                                                            | -1.427504 | -1.452908 | -0.293763 |
| 6                                                      | -1.017436 | 0.698079  | 1.367622  | 6                                                                            | -0.427149 | -0.699237 | -1.084004 |
| 7                                                      | -3.479330 | 0.065106  | -0.177573 | 7                                                                            | 3.552107  | -0.097655 | -0.276361 |

|   |           |           |           |   |           |           |           |
|---|-----------|-----------|-----------|---|-----------|-----------|-----------|
| 8 | 1.374247  | 2.710193  | -0.153558 | 1 | 1.992430  | 0.000059  | -1.625274 |
| 8 | 1.436782  | -2.703060 | -0.138535 | 1 | 1.560336  | -2.203881 | -0.120483 |
| 1 | -2.102849 | -0.057372 | -1.710066 | 1 | 0.624817  | -1.354755 | 2.206330  |
| 1 | -1.536782 | 2.141914  | -0.260177 | 1 | 0.641352  | 1.307086  | 2.235985  |
| 1 | -0.839058 | 1.380587  | 2.192001  | 1 | 1.560648  | 2.191984  | -0.082668 |
| 1 | -0.800850 | -1.277606 | 2.259103  | 1 | -0.008792 | 1.252345  | -1.924945 |
| 1 | -1.473399 | -2.180512 | -0.150250 | 8 | -1.563309 | 2.681536  | -0.402463 |
| 1 | 0.067237  | -1.184404 | -1.823239 | 1 | -2.870261 | 1.265767  | 1.333037  |
| 1 | 3.352094  | -1.214741 | 0.671795  | 1 | -2.886418 | -1.239513 | 1.326089  |
| 1 | 3.326737  | 1.272323  | 0.655427  | 8 | -1.597934 | -2.661595 | -0.417204 |
| 1 | 0.075477  | 1.129778  | -1.859351 | 1 | -0.024229 | -1.244967 | -1.932126 |
| 1 | -4.002008 | -0.744874 | -0.506435 | 1 | 3.718825  | -0.055915 | 0.728431  |
| 1 | -3.521708 | 0.051301  | 0.840479  | 1 | 4.016482  | 0.714002  | -0.682454 |

| <b>15</b> Et = -667.8126125 (-667.9940374)<br>Nimag = 0 |           |           |           | <b>15<sup>†</sup></b> Et = -667.7591846 (-667.9437432)<br>Nimag = 1(-435.70) |           |           |           |
|---------------------------------------------------------|-----------|-----------|-----------|------------------------------------------------------------------------------|-----------|-----------|-----------|
| 6                                                       | 0.841249  | -0.670159 | 1.344329  | 6                                                                            | -1.881836 | -0.001016 | -0.566644 |
| 6                                                       | 0.976229  | -1.134687 | -0.099453 | 6                                                                            | -1.177053 | 1.161553  | 0.130142  |
| 6                                                       | -0.377337 | -0.780815 | -0.827023 | 6                                                                            | -0.809150 | 0.700468  | 1.399851  |
| 6                                                       | -0.377031 | 0.780787  | -0.826989 | 6                                                                            | -0.808929 | -0.702570 | 1.399708  |
| 6                                                       | 0.976668  | 1.134059  | -0.099419 | 6                                                                            | -1.176990 | -1.163550 | 0.130091  |
| 6                                                       | 0.841372  | 0.669558  | 1.344332  | 6                                                                            | 0.631617  | -0.703486 | -1.078189 |
| 6                                                       | -1.567834 | -1.485639 | -0.192104 | 6                                                                            | 1.628965  | -1.460312 | -0.281933 |
| 6                                                       | -2.712756 | -0.672375 | 0.280803  | 6                                                                            | 2.454282  | -0.671574 | 0.671534  |
| 6                                                       | -2.712488 | 0.673198  | 0.280848  | 6                                                                            | 2.453442  | 0.673831  | 0.671634  |
| 6                                                       | -1.567258 | 1.486044  | -0.192043 | 6                                                                            | 1.627113  | 1.461561  | -0.281742 |
| 6                                                       | 1.871013  | -0.000508 | -0.683822 | 6                                                                            | 0.630456  | 0.703516  | -1.077866 |
| 8                                                       | -1.583650 | 2.702288  | -0.078138 | 6                                                                            | -3.321585 | -0.000884 | -0.245844 |
| 8                                                       | -1.584607 | -2.701866 | -0.078062 | 1                                                                            | -1.787824 | -0.000915 | -1.654848 |
| 6                                                       | 3.256753  | -0.000545 | -0.212879 | 1                                                                            | -1.368907 | 2.198202  | -0.121579 |
| 7                                                       | 4.367774  | 0.000545  | 0.123733  | 1                                                                            | -0.457150 | 1.328704  | 2.210000  |
| 1                                                       | 1.880148  | -0.000534 | -1.780912 | 1                                                                            | -0.456708 | -1.330854 | 2.209729  |
| 1                                                       | 1.301026  | -2.162129 | -0.259308 | 1                                                                            | -1.368246 | -2.200218 | -0.121972 |
| 1                                                       | 0.679964  | -1.333642 | 2.186293  | 1                                                                            | 0.240439  | -1.249350 | -1.932245 |
| 1                                                       | 0.680250  | 1.333079  | 2.186301  | 8                                                                            | 1.782838  | -2.670715 | -0.398037 |
| 1                                                       | 1.301934  | 2.161357  | -0.259239 | 1                                                                            | 3.096193  | -1.251297 | 1.330182  |
| 1                                                       | -0.325155 | 1.156726  | -1.856291 | 1                                                                            | 3.094614  | 1.254286  | 1.330356  |
| 1                                                       | -3.555941 | 1.244202  | 0.661792  | 8                                                                            | 1.779260  | 2.672157  | -0.397828 |
| 1                                                       | -3.556434 | -1.243069 | 0.661714  | 1                                                                            | 0.238773  | 1.248953  | -1.931967 |
| 1                                                       | -0.325638 | -1.156692 | -1.856359 | 7                                                                            | -4.461423 | 0.000819  | -0.025027 |

| <b>16</b> Et = -690.0906904 (-690.2829441)<br>Nimag = 0 |           |           |           | <b>16<sup>†</sup></b> Et = -690.035742 (-690.231504)<br>Nimag = 1(-411.48) |          |           |           |
|---------------------------------------------------------|-----------|-----------|-----------|----------------------------------------------------------------------------|----------|-----------|-----------|
| 6                                                       | -0.530917 | -0.775582 | -0.812538 | 6                                                                          | 1.778399 | -0.273321 | -0.323210 |
| 6                                                       | 0.713320  | -1.305047 | -0.000392 | 6                                                                          | 0.887626 | -1.360079 | 0.269305  |
| 6                                                       | 1.769357  | -0.281357 | -0.473387 | 6                                                                          | 0.458516 | -0.903464 | 1.513011  |

|   |           |           |           |   |           |           |           |
|---|-----------|-----------|-----------|---|-----------|-----------|-----------|
| 6 | 0.978097  | 0.941861  | 0.086569  | 6 | 0.621446  | 0.496661  | 1.573946  |
| 6 | -0.339999 | 0.775584  | -0.765061 | 6 | 1.154905  | 0.946598  | 0.368504  |
| 6 | 0.671353  | 0.459738  | 1.494432  | 6 | -0.579277 | 0.740900  | -1.048465 |
| 6 | 0.518382  | -0.869967 | 1.444623  | 6 | -1.532787 | 1.592603  | -0.303171 |
| 6 | -1.841659 | -1.339007 | -0.286372 | 6 | -2.512288 | 0.883425  | 0.563538  |
| 6 | -2.897390 | -0.400708 | 0.164049  | 6 | -2.671855 | -0.451756 | 0.514446  |
| 6 | -2.735064 | 0.934391  | 0.197010  | 6 | -1.880179 | -1.306964 | -0.410376 |
| 6 | -1.483988 | 1.612462  | -0.216880 | 6 | -0.745299 | -0.652489 | -1.100571 |
| 8 | -1.382880 | 2.827240  | -0.120977 | 8 | 3.111841  | -0.529749 | 0.106284  |
| 8 | -2.032164 | -2.545532 | -0.238763 | 1 | 1.765474  | -0.218458 | -1.418151 |
| 8 | 3.026418  | -0.547377 | 0.088942  | 1 | 0.974698  | -2.403461 | -0.011262 |
| 1 | 1.855108  | -0.237782 | -1.573235 | 1 | -0.027525 | -1.510120 | 2.269015  |
| 1 | 0.930236  | -2.358890 | -0.174177 | 1 | 0.280902  | 1.130288  | 2.385515  |
| 1 | 0.222496  | -1.533280 | 2.249970  | 1 | 1.455182  | 1.970607  | 0.176531  |
| 1 | 0.530115  | 1.109804  | 2.351143  | 1 | -0.036191 | 1.257151  | -1.834802 |
| 1 | 1.417928  | 1.934969  | -0.010308 | 8 | -1.538794 | 2.816593  | -0.390637 |
| 1 | -0.148727 | 1.160195  | -1.774562 | 1 | -3.128163 | 1.518250  | 1.195915  |
| 1 | -3.523348 | 1.596891  | 0.547260  | 1 | -3.425457 | -0.967931 | 1.104267  |
| 1 | -3.823098 | -0.871270 | 0.487487  | 8 | -2.175351 | -2.484422 | -0.587689 |
| 1 | -0.449448 | -1.132369 | -1.846708 | 1 | -0.333974 | -1.222568 | -1.928395 |
| 6 | 4.035514  | 0.360828  | -0.309356 | 6 | 4.067658  | 0.343445  | -0.469306 |
| 1 | 4.975063  | -0.007412 | 0.109908  | 1 | 5.048738  | -0.009735 | -0.142597 |
| 1 | 4.128288  | 0.408547  | -1.406374 | 1 | 4.027378  | 0.320099  | -1.569975 |
| 1 | 3.852352  | 1.376770  | 0.069803  | 1 | 3.936201  | 1.383148  | -0.135638 |

| <b>17</b> Et = -780.0716469 (-780.2929738)<br>Nimag = 0 |           |           |           | <b>17<sup>†</sup></b> Et = -780.0166751(-780.2410079)<br>Nimag = 1(-422.59) |           |           |           |
|---------------------------------------------------------|-----------|-----------|-----------|-----------------------------------------------------------------------------|-----------|-----------|-----------|
| 6                                                       | 0.544003  | -0.670258 | 1.352157  | 6                                                                           | -1.548499 | -0.034037 | -0.503901 |
| 6                                                       | 0.683673  | -1.136818 | -0.092121 | 6                                                                           | -0.885406 | 1.098932  | 0.264427  |
| 6                                                       | -0.667005 | -0.782152 | -0.825840 | 6                                                                           | -0.487544 | 0.556475  | 1.490586  |
| 6                                                       | -0.666996 | 0.782202  | -0.825800 | 6                                                                           | -0.453823 | -0.845642 | 1.387447  |
| 6                                                       | 0.683696  | 1.136810  | -0.092081 | 6                                                                           | -0.837141 | -1.221286 | 0.096858  |
| 6                                                       | 0.544014  | 0.670205  | 1.352182  | 6                                                                           | 0.928527  | -0.608786 | -1.135545 |
| 6                                                       | -1.860557 | -1.486894 | -0.196031 | 6                                                                           | 1.955440  | -1.403749 | -0.417809 |
| 6                                                       | -3.010341 | -0.672837 | 0.263226  | 6                                                                           | 2.773368  | -0.674650 | 0.587700  |
| 6                                                       | -3.010329 | 0.672852  | 0.263271  | 6                                                                           | 2.744073  | 0.666532  | 0.694327  |
| 6                                                       | -1.860532 | 1.486920  | -0.195933 | 6                                                                           | 1.890458  | 1.509290  | -0.185077 |
| 6                                                       | 1.553308  | -0.000008 | -0.659901 | 6                                                                           | 0.896006  | 0.794386  | -1.021801 |
| 8                                                       | -1.875947 | 2.702311  | -0.076007 | 7                                                                           | -3.057171 | -0.012647 | -0.168666 |
| 8                                                       | -1.875977 | -2.702289 | -0.076148 | 1                                                                           | -1.540113 | 0.057958  | -1.587266 |
| 7                                                       | 2.971053  | -0.000015 | -0.139117 | 1                                                                           | -1.124158 | 2.140260  | 0.085766  |
| 8                                                       | 3.505346  | -1.091318 | 0.027923  | 1                                                                           | -0.143016 | 1.132099  | 2.341927  |
| 8                                                       | 3.505492  | 1.091289  | 0.027467  | 1                                                                           | -0.085742 | -1.522404 | 2.149676  |
| 1                                                       | 1.656022  | 0.000023  | -1.750332 | 1                                                                           | -1.004065 | -2.241041 | -0.227609 |
| 1                                                       | 1.020797  | -2.157949 | -0.254354 | 1                                                                           | 0.528671  | -1.094380 | -2.021314 |
| 1                                                       | 0.388768  | -1.334440 | 2.194471  | 8                                                                           | 2.138685  | -2.595307 | -0.637812 |

|   |           |           |           |   |           |           |           |
|---|-----------|-----------|-----------|---|-----------|-----------|-----------|
| 1 | 0.388785  | 1.334359  | 2.194518  | 1 | 3.436929  | -1.289868 | 1.190310  |
| 1 | 1.020854  | 2.157932  | -0.254291 | 1 | 3.382458  | 1.206680  | 1.389067  |
| 1 | -0.612621 | 1.156438  | -1.855815 | 8 | 2.018712  | 2.727832  | -0.210161 |
| 1 | -3.858129 | 1.243224  | 0.635462  | 1 | 0.469911  | 1.396044  | -1.819899 |
| 1 | -3.858151 | -1.243219 | 0.635378  | 8 | -3.520259 | -0.863207 | 0.576974  |
| 1 | -0.612614 | -1.156330 | -1.855875 | 8 | -3.683817 | 0.890481  | -0.711910 |

| <b>18</b> Et = -650.7870691 (-650.9764136)<br>Nimag = 0 |           |           |           | <b>18<sup>†</sup></b> Et = -650.7310391 (-650.9240606)<br>Nimag = 1 (-401.37) |           |           |           |
|---------------------------------------------------------|-----------|-----------|-----------|-------------------------------------------------------------------------------|-----------|-----------|-----------|
| 6                                                       | 1.035397  | -0.672023 | 1.371830  | 6                                                                             | -2.096566 | -0.000307 | -0.553839 |
| 6                                                       | 1.189737  | -1.134038 | -0.069533 | 6                                                                             | -1.386641 | 1.161968  | 0.145515  |
| 6                                                       | -0.151740 | -0.781799 | -0.816319 | 6                                                                             | -1.013966 | 0.706965  | 1.409237  |
| 6                                                       | -0.151737 | 0.781795  | -0.816318 | 6                                                                             | -1.014603 | -0.708164 | 1.409360  |
| 6                                                       | 1.189746  | 1.134037  | -0.069545 | 6                                                                             | -1.388232 | -1.163093 | 0.146051  |
| 6                                                       | 1.035415  | 0.672044  | 1.371824  | 6                                                                             | 0.426718  | -0.701761 | -1.092067 |
| 6                                                       | -1.354300 | -1.486971 | -0.208636 | 6                                                                             | 1.410358  | -1.461014 | -0.285817 |
| 6                                                       | -2.493098 | -0.672705 | 0.278496  | 6                                                                             | 2.217946  | -0.672489 | 0.683227  |
| 6                                                       | -2.493093 | 0.672710  | 0.278501  | 6                                                                             | 2.217612  | 0.673120  | 0.683474  |
| 6                                                       | -1.354294 | 1.486972  | -0.208636 | 6                                                                             | 1.409665  | 1.461458  | -0.285370 |
| 6                                                       | 2.097730  | -0.000007 | -0.629512 | 6                                                                             | 0.425838  | 0.701901  | -1.091451 |
| 8                                                       | -1.390465 | 2.705915  | -0.123757 | 8                                                                             | -3.503892 | 0.000740  | -0.324248 |
| 8                                                       | -1.390473 | -2.705914 | -0.123749 | 1                                                                             | -2.002026 | -0.000584 | -1.638769 |
| 8                                                       | 3.432824  | -0.000013 | -0.197231 | 1                                                                             | -1.566175 | 2.200559  | -0.109678 |
| 1                                                       | 2.142799  | -0.000012 | -1.723723 | 1                                                                             | -0.669959 | 1.330480  | 2.227198  |
| 1                                                       | 1.516350  | -2.162309 | -0.225280 | 1                                                                             | -0.671066 | -1.331852 | 2.227394  |
| 1                                                       | 0.863463  | -1.329075 | 2.218031  | 1                                                                             | -1.567855 | -2.201598 | -0.109383 |
| 1                                                       | 0.863497  | 1.329108  | 2.218019  | 1                                                                             | 0.018240  | -1.249505 | -1.936295 |
| 1                                                       | 1.516360  | 2.162306  | -0.225314 | 8                                                                             | 1.573269  | -2.670829 | -0.405297 |
| 1                                                       | -0.077001 | 1.156563  | -1.844628 | 1                                                                             | 2.850630  | -1.252243 | 1.350911  |
| 1                                                       | -3.337351 | 1.243508  | 0.658466  | 1                                                                             | 2.850007  | 1.252981  | 1.351339  |
| 1                                                       | -3.337359 | -1.243500 | 0.658458  | 8                                                                             | 1.572011  | 2.671307  | -0.404843 |
| 1                                                       | -0.077002 | -1.156567 | -1.844628 | 1                                                                             | 0.017512  | 1.249580  | -1.935804 |
| 1                                                       | 3.412579  | -0.000009 | 0.775595  | 1                                                                             | -3.639190 | 0.000931  | 0.638267  |

| <b>19</b> Et = 674.8056756 (-675.0000583)<br>Nimag = 0 |           |           |           | <b>19<sup>†</sup></b> Et = -674.7493579 (-674.9477873)<br>Nimag = (-393.4697) |           |           |           |
|--------------------------------------------------------|-----------|-----------|-----------|-------------------------------------------------------------------------------|-----------|-----------|-----------|
| 6                                                      | 0.140923  | 0.782449  | -0.816662 | 6                                                                             | -2.072668 | -0.001194 | -0.550203 |
| 6                                                      | -1.197143 | 1.133028  | -0.058730 | 6                                                                             | -1.390897 | 1.163617  | .158174   |
| 6                                                      | -2.080509 | -0.000049 | -0.620596 | 6                                                                             | -1.027673 | .707569   | 1.420828  |
| 6                                                      | -1.197134 | -1.133120 | -0.058728 | 6                                                                             | -1.028662 | -.707013  | 1.422363  |
| 6                                                      | 0.140977  | -0.782517 | -0.816575 | 6                                                                             | -1.393496 | -1.165380 | .161320   |
| 6                                                      | -1.034154 | -0.669985 | 1.381357  | 6                                                                             | .421624   | -.701575  | -1.099496 |
| 6                                                      | -1.034104 | 0.669882  | 1.381350  | 6                                                                             | 1.400584  | -1.461328 | -.287629  |
| 6                                                      | 1.344100  | 1.487497  | -0.209714 | 6                                                                             | 2.202490  | -.672589  | .685622   |
| 6                                                      | 2.486567  | 0.672857  | 0.267191  | 6                                                                             | 2.202171  | .673185   | .685937   |
| 6                                                      | 2.486613  | -0.672634 | 0.267265  | 6                                                                             | 1.399612  | 1.461709  | -.286809  |

|   |           |           |           |   |           |           |           |
|---|-----------|-----------|-----------|---|-----------|-----------|-----------|
| 6 | 1.344127  | -1.487400 | -0.209382 | 6 | .420070   | .701580   | -1.098358 |
| 8 | 1.376981  | -2.705709 | -0.119735 | 9 | -3.439445 | .000881   | -.248701  |
| 8 | 1.376566  | 2.705780  | -0.119567 | 1 | -1.997740 | -.002713  | -1.637980 |
| 9 | -3.364495 | -0.000055 | -0.113299 | 1 | -1.572776 | 2.200422  | -.100292  |
| 1 | -2.158155 | -0.000051 | -1.714979 | 1 | -.694164  | 1.332289  | 2.241855  |
| 1 | -1.529183 | 2.159153  | -0.216149 | 1 | -.695755  | -1.330357 | 2.244689  |
| 1 | -0.866489 | 1.332040  | 2.223514  | 1 | -1.575023 | -2.202554 | -.095814  |
| 1 | -0.866570 | -1.332148 | 2.223523  | 1 | .013823   | -1.250382 | -1.943570 |
| 1 | -1.529151 | -2.159249 | 0.216166  | 8 | 1.563419  | -2.670813 | -.407264  |
| 1 | 0.066948  | -1.156538 | -1.845351 | 1 | 2.831878  | -1.252116 | 1.356528  |
| 1 | 3.333222  | -1.243086 | 0.642321  | 1 | 2.831320  | 1.252779  | 1.357004  |
| 1 | 3.333126  | 1.243407  | 0.642212  | 8 | 1.561783  | 2.671170  | -.406714  |
| 1 | 0.066760  | 1.156358  | -1.845468 | 1 | .012907   | 1.250365  | -1.942787 |

**Table S6.** The B3LYP/6-31G\* optimized geometries (in Cartesian coordinates), total electronic energies (in hartree/particle), and number of imaginary frequencies of substituted cyclopentadienes and quinone. The values in parenthesis implies single-point energies evaluated at the **B3LYP/6-311+G\*\*//B3LYP/6-31G\*** level. (**n'**) indicate substituted cyclopentadiene.

| <b>1'</b> Et = -602.7811806(-602.899291) |           |           |           | <b>2'</b> Et = -2270.284222 (-2272.3669232) |           |           |           |
|------------------------------------------|-----------|-----------|-----------|---------------------------------------------|-----------|-----------|-----------|
| Nimag = 0                                |           |           |           | Nimag = 0                                   |           |           |           |
| 6                                        | -0.608435 | -0.000116 | -0.889142 | 6                                           | -2.164874 | 0.728183  | -0.386977 |
| 6                                        | -1.434434 | 1.172213  | -0.467830 | 6                                           | -1.126807 | 1.174074  | 0.366969  |
| 6                                        | -2.528765 | 0.728395  | 0.202434  | 6                                           | -0.345927 | -0.000014 | 0.853663  |
| 6                                        | -2.528728 | -0.728349 | 0.202693  | 6                                           | -1.126820 | -1.174081 | 0.366941  |
| 6                                        | -1.434395 | -1.172357 | -0.467428 | 6                                           | -2.164904 | -0.728160 | -0.386964 |
| 1                                        | -0.335585 | -0.000244 | -1.954805 | 32                                          | 1.365119  | -0.000001 | -0.152437 |
| 14                                       | 1.082369  | -0.000105 | 0.059650  | 1                                           | -0.081819 | -0.000030 | 1.917375  |
| 1                                        | -1.161726 | -2.206048 | -0.648769 | 1                                           | -0.857485 | 2.205258  | 0.565682  |
| 1                                        | -3.292200 | -1.346306 | 0.664416  | 1                                           | -2.884361 | 1.345806  | -0.914097 |
| 1                                        | -1.161802 | 2.205832  | -0.649612 | 1                                           | -0.857511 | -2.205273 | 0.565630  |
| 1                                        | -3.292337 | 1.346483  | 0.663823  | 1                                           | -2.884410 | -1.345762 | -0.914082 |
| 6                                        | 2.056065  | -1.539591 | -0.463876 | 1                                           | 2.196383  | 1.252750  | 0.219497  |
| 6                                        | 2.051444  | 1.545220  | -0.455181 | 1                                           | 2.196592  | -1.252512 | 0.219840  |
| 6                                        | 0.804986  | -0.005403 | 1.927695  | 1                                           | 1.064780  | -0.000230 | -1.663659 |
| 1                                        | 1.763679  | 0.005184  | 2.460677  |                                             |           |           |           |
| 1                                        | 0.232100  | 0.871623  | 2.246611  |                                             |           |           |           |
| 1                                        | 0.252279  | -0.895670 | 2.245487  |                                             |           |           |           |
| 1                                        | 3.049844  | -1.548641 | 0.000908  |                                             |           |           |           |
| 1                                        | 1.545191  | -2.462439 | -0.165766 |                                             |           |           |           |
| 1                                        | 2.201387  | -1.575197 | -1.550468 |                                             |           |           |           |
| 1                                        | 3.047046  | 1.552182  | 0.005725  |                                             |           |           |           |
| 1                                        | 2.192383  | 1.589953  | -1.542011 |                                             |           |           |           |
| 1                                        | 1.540148  | 2.464686  | -0.147499 |                                             |           |           |           |

|                                                         |           |           |           |                                                         |           |           |           |
|---------------------------------------------------------|-----------|-----------|-----------|---------------------------------------------------------|-----------|-----------|-----------|
| <b>3' Et = -219.5324457 (-219.5925372)</b><br>Nimag = 0 |           |           |           | <b>4' Et = -536.0439888 (-536.1270914)</b><br>Nimag = 0 |           |           |           |
| 6                                                       | -.134194  | 1.180499  | .154501   | 6                                                       | .235276   | .000000   | .678611   |
| 6                                                       | .778748   | -.000123  | .349830   | 1                                                       | .521655   | .000002   | 1.736977  |
| 6                                                       | -.134495  | -1.180554 | .154453   | 6                                                       | -.612281  | -1.177376 | .288913   |
| 6                                                       | -1.369548 | -.732631  | -.160443  | 1                                                       | -.316355  | -2.209185 | .440262   |
| 6                                                       | -1.369370 | .732905   | -.160382  | 6                                                       | -1.749966 | -.731556  | -.290732  |
| 1                                                       | 1.178280  | -.000412  | 1.394295  | 1                                                       | -2.546480 | -1.346794 | -.696079  |
| 5                                                       | 2.166915  | -.000054  | -.379733  | 6                                                       | -.612281  | 1.177376  | .288910   |
| 1                                                       | .190710   | 2.211656  | .232469   | 1                                                       | -.316354  | 2.209186  | .440257   |
| 1                                                       | -2.236477 | 1.346955  | -.381105  | 6                                                       | -1.749969 | .731555   | -.290729  |
| 1                                                       | .190031   | -2.211806 | .232676   | 1                                                       | -2.546485 | 1.346792  | -.696073  |
| 1                                                       | -2.236812 | -1.346501 | -.381068  | 15                                                      | 1.810103  | .000000   | -.394140  |
| 1                                                       | 2.726149  | -1.031175 | -.613682  | 1                                                       | 2.493904  | 1.032097  | .318458   |
| 1                                                       | 2.726700  | 1.030977  | -.612674  | 1                                                       | 2.493905  | -1.032094 | .318462   |
| <b>5' Et = -351.353873 (-351.4507471)</b><br>Nimag = 0  |           |           |           | <b>6' Et = -307.4164566(-307.506418)</b><br>Nimag = 0   |           |           |           |
| 6                                                       | -1.162748 | -1.177462 | -.290453  | 6                                                       | .578767   | -1.180505 | .267727   |
| 6                                                       | -.268460  | .000032   | -.616797  | 6                                                       | -.307901  | -.000211  | .579388   |
| 6                                                       | -1.162686 | 1.177511  | -.290067  | 6                                                       | .578352   | 1.180426  | .267876   |
| 6                                                       | -2.366388 | .734465   | .124825   | 6                                                       | 1.749931  | .732835   | -.236025  |
| 6                                                       | -2.366230 | -.734462  | .125124   | 6                                                       | 1.750235  | -.732437  | -.236003  |
| 6                                                       | 1.154087  | -.000043  | .040965   | 1                                                       | -.734639  | -.000366  | 1.588024  |
| 6                                                       | 1.043710  | -.003044  | 1.577032  | 6                                                       | -1.467709 | -.000176  | -.427651  |
| 6                                                       | 1.931142  | -1.248933 | -.420204  | 1                                                       | .266712   | -2.211130 | .387986   |
| 6                                                       | 1.929124  | 1.251911  | -.415456  | 1                                                       | 2.576436  | -1.346107 | -.579761  |
| 1                                                       | -.101274  | .000296   | -1.709772 | 1                                                       | .265939   | 2.210928  | .388252   |
| 1                                                       | -.866703  | -2.213103 | -.409847  | 1                                                       | 2.575872  | 1.346856  | -.579780  |
| 1                                                       | -3.215759 | -1.348976 | .406238   | 8                                                       | -2.638539 | .000082   | -.126320  |
| 1                                                       | -.866482  | 2.213118  | -.409323  | 1                                                       | -1.132055 | -.000429  | -1.486037 |
| 1                                                       | -3.216034 | 1.348917  | .405728   |                                                         |           |           |           |
| 1                                                       | 2.040808  | .001547   | 2.034365  |                                                         |           |           |           |
| 1                                                       | .502745   | .878460   | 1.937403  |                                                         |           |           |           |
| 1                                                       | .512217   | -.891376  | 1.934721  |                                                         |           |           |           |
| 1                                                       | 2.951667  | -1.233330 | -.018519  |                                                         |           |           |           |
| 1                                                       | 1.457084  | -2.174321 | -.075961  |                                                         |           |           |           |
| 1                                                       | 2.005665  | -1.293439 | -1.514098 |                                                         |           |           |           |
| 1                                                       | 2.952037  | 1.232748  | -.020059  |                                                         |           |           |           |
| 1                                                       | 1.997091  | 1.304748  | -1.509407 |                                                         |           |           |           |
| 1                                                       | 1.457634  | 2.174864  | -.061282  |                                                         |           |           |           |

| <b>7'</b> Et = -272.7236322 (-272.7996242)<br>Nimag = 0 |           |           |           | <b>8'</b> Et = -194.101061(-194.156098)<br>Nimag = 0 |           |           |          |
|---------------------------------------------------------|-----------|-----------|-----------|------------------------------------------------------|-----------|-----------|----------|
| 6                                                       | -0.150478 | 0.000019  | -0.851119 |                                                      |           |           |          |
| 1                                                       | -0.063929 | 0.000038  | -1.952152 |                                                      |           |           |          |
| 6                                                       | 0.625602  | -1.177875 | -0.309701 |                                                      |           |           |          |
| 1                                                       | 0.351783  | -2.211140 | -0.495139 | 6                                                    | 1.184388  | .282257   | .000000  |
| 6                                                       | 1.679559  | -0.735445 | 0.405770  | 6                                                    | .547814   | -1.083887 | .000000  |
| 1                                                       | 2.423716  | -1.348478 | 0.904647  | 6                                                    | -.793759  | -.944831  | .000000  |
| 6                                                       | 0.625612  | 1.177887  | -0.309659 | 6                                                    | -1.134665 | .485268   | .000000  |
| 1                                                       | 0.351800  | 2.211160  | -0.495058 | 6                                                    | .000000   | 1.214368  | .000000  |
| 6                                                       | 1.679568  | 0.735422  | 0.405792  | 1                                                    | 1.830476  | .436458   | .878061  |
| 1                                                       | 2.423731  | 1.348432  | 0.904689  | 1                                                    | 1.830476  | .436458   | -.878061 |
| 6                                                       | -1.662811 | 0.000019  | -0.514918 | 1                                                    | .081157   | 2.295398  | .000000  |
| 1                                                       | -2.116285 | 0.874668  | -0.997477 | 1                                                    | -2.148598 | .872496   | .000000  |
| 1                                                       | -2.116297 | -0.874595 | -0.997526 | 1                                                    | 1.107848  | -2.012098 | .000000  |
| 6                                                       | -1.977064 | -0.000023 | 0.999003  | 1                                                    | -1.524025 | -1.747769 | .000000  |
| 1                                                       | -2.557170 | 0.881696  | 1.290801  |                                                      |           |           |          |
| 1                                                       | -2.557640 | -0.881482 | 1.290653  |                                                      |           |           |          |
| 1                                                       | -1.059630 | -0.000318 | 1.595550  |                                                      |           |           |          |

| <b>9'</b> Et = -233.4149779 (-233.480406)<br>Nimag = 0  |           |           |           | <b>10'</b> Et = -592.2821052 (-592.3666809)<br>Nimag = 0 |           |           |           |
|---------------------------------------------------------|-----------|-----------|-----------|----------------------------------------------------------|-----------|-----------|-----------|
| 6                                                       | 0.210807  | -1.178242 | 0.182623  | 6                                                        | -0.608196 | 1.193681  | 0.208489  |
| 6                                                       | -0.696614 | -0.000053 | 0.452099  | 6                                                        | 0.253125  | 0.025775  | 0.613414  |
| 6                                                       | 0.210757  | 1.178216  | 0.182827  | 6                                                        | -0.597787 | -1.170654 | 0.262718  |
| 6                                                       | 1.432934  | 0.735416  | -0.173972 | 6                                                        | -1.770379 | -0.739413 | -0.241103 |
| 6                                                       | 1.433073  | -0.735326 | -0.173726 | 6                                                        | -1.777718 | 0.731711  | -0.275113 |
| 1                                                       | -0.976474 | -0.000164 | 1.520018  | 1                                                        | 0.484972  | 0.043966  | 1.686281  |
| 6                                                       | -1.994904 | -0.000006 | -0.378385 | 16                                                       | 1.867228  | -0.082531 | -0.302913 |
| 1                                                       | -0.108896 | -2.211105 | 0.270917  | 1                                                        | -0.297461 | 2.227010  | 0.307018  |
| 1                                                       | 2.293380  | -1.348205 | -0.423882 | 1                                                        | -2.603608 | 1.332086  | -0.642018 |
| 1                                                       | -0.109017 | 2.211046  | 0.271243  | 1                                                        | -0.280343 | -2.193960 | 0.422139  |
| 1                                                       | 2.293147  | 1.348372  | -0.424258 | 1                                                        | -2.593919 | -1.364031 | -0.570821 |
| 1                                                       | -2.601201 | -0.885468 | -0.156242 | 1                                                        | 2.420440  | 1.028813  | 0.233574  |
| 1                                                       | -2.600378 | 0.886303  | -0.157389 |                                                          |           |           |           |
| 1                                                       | -1.766876 | -0.000802 | -1.449206 |                                                          |           |           |           |
| <b>11'</b> Et = -346.7402073(-346.8406111)<br>Nimag = 0 |           |           |           | <b>12'</b> Et = -382.6635037 (-382.7836801)<br>Nimag = 0 |           |           |           |
| 6                                                       | -0.804187 | -1.176151 | 0.401642  | 6                                                        | -.780606  | -1.220468 | .002760   |
| 6                                                       | -0.003599 | -0.413104 | -0.632328 | 6                                                        | -.021844  | -.041453  | .585153   |
| 6                                                       | -0.895419 | 0.763575  | -0.939668 | 6                                                        | -.981497  | 1.107826  | .412579   |
| 6                                                       | -2.016084 | 0.685591  | -0.190690 | 6                                                        | -2.122664 | .646485   | -.133514  |
| 6                                                       | -1.958096 | -0.519343 | 0.645118  | 6                                                        | -1.997126 | -.797013  | -.389577  |
| 1                                                       | 0.187776  | -1.029740 | -1.520216 | 6                                                        | 1.354635  | .174791   | -.026156  |
| 6                                                       | 1.389908  | -0.047828 | -0.067336 | 1                                                        | .151576   | -.232774  | 1.658493  |

Supplementary Material (ESI) for Organic and Biomolecular Chemistry  
 This journal is © The Royal Society of Chemistry 2006

|   |           |           |           |   |           |           |          |
|---|-----------|-----------|-----------|---|-----------|-----------|----------|
| 1 | -0.461364 | -2.099023 | 0.854404  | 1 | -.372768  | -2.221738 | -.048419 |
| 1 | -2.736602 | -0.825954 | 1.336135  | 1 | -2.777314 | -1.412416 | -.825357 |
| 1 | -0.643974 | 1.534925  | -1.658787 | 1 | -.745411  | 2.127111  | .690146  |
| 1 | -2.843498 | 1.387737  | -0.199095 | 1 | -3.006003 | 1.233621  | -.361569 |
| 8 | 2.378977  | -0.649915 | -0.432715 | 8 | 2.124038  | -.936735  | .108317  |
| 6 | 1.458201  | 1.067650  | 0.958677  | 8 | 1.758686  | 1.187175  | -.548337 |
| 1 | 0.573037  | 1.078726  | 1.601271  | 1 | 2.982738  | -.718338  | -.300608 |
| 1 | 2.366741  | 0.956318  | 1.555062  |   |           |           |          |
| 1 | 1.501728  | 2.033986  | 0.440466  |   |           |           |          |

| <b>13'</b> Et = -653.6919636 (-653.7744958)<br>Nimag = 0 |           |           |           | <b>14'</b> Et = -249.4349114(-249.5146512)<br>Nimag = 0 |           |           |          |
|----------------------------------------------------------|-----------|-----------|-----------|---------------------------------------------------------|-----------|-----------|----------|
| 6                                                        | 1.776071  | -0.739309 | -0.239845 | 6                                                       | -.190972  | 1.180770  | .134830  |
| 6                                                        | 0.590050  | -1.187659 | 0.207047  | 6                                                       | .719982   | -.000003  | .397333  |
| 6                                                        | -0.259462 | 0.000000  | 0.583071  | 6                                                       | -.191037  | -1.180794 | .135021  |
| 6                                                        | 0.590050  | 1.187659  | 0.207047  | 6                                                       | -1.429681 | -.737010  | -.145097 |
| 6                                                        | 1.776071  | 0.739310  | -0.239846 | 6                                                       | -1.429765 | .737006   | -.144655 |
| 17                                                       | -1.887798 | 0.000000  | -0.252743 | 1                                                       | .945155   | .000046   | 1.486919 |
| 1                                                        | -0.498126 | 0.000000  | 1.652855  | 7                                                       | 1.931726  | -.000116  | -.438888 |
| 1                                                        | 0.261624  | -2.212356 | 0.324687  | 1                                                       | .135291   | 2.212978  | .203197  |
| 1                                                        | 2.615385  | -1.349906 | -0.555222 | 1                                                       | -2.304155 | 1.348919  | -.342678 |
| 1                                                        | 0.261624  | 2.212356  | 0.324688  | 1                                                       | .135239   | -2.212995 | .203417  |
| 1                                                        | 2.615385  | 1.349906  | -0.555223 | 1                                                       | -2.304021 | -1.348886 | -.343437 |
|                                                          |           |           |           | 1                                                       | 2.500119  | -.812381  | -.199075 |
|                                                          |           |           |           | 1                                                       | 2.499128  | .813320   | -.200716 |

| <b>15'</b> Et = -286.3352393(-286.4144668)<br>Nimag = 0 |           |           |          | <b>16'</b> Et = -308.6074871 (-308.6980455)<br>Nimag = 0 |           |           |          |
|---------------------------------------------------------|-----------|-----------|----------|----------------------------------------------------------|-----------|-----------|----------|
| 7                                                       | -2.727916 | .000463   | -.504174 | 6                                                        | -.431319  | 1.147443  | .105001  |
| 6                                                       | -1.674353 | -.000898  | -.016468 | 6                                                        | .231902   | -.198381  | .364523  |
| 6                                                       | -.344128  | -.000581  | .604082  | 6                                                        | -.890157  | -1.181991 | .116763  |
| 6                                                       | .513797   | -1.190089 | .203095  | 6                                                        | -2.025461 | -.504984  | -.123716 |
| 6                                                       | 1.678537  | -.734886  | -.292868 | 6                                                        | -1.739435 | .945430   | -.129942 |
| 6                                                       | 1.677872  | .735951   | -.292508 | 1                                                        | .488170   | -.237653  | 1.444988 |
| 6                                                       | .512717   | 1.189879  | .203652  | 8                                                        | 1.382770  | -.518509  | -.398329 |
| 1                                                       | -.486476  | -.000912  | 1.697678 | 1                                                        | .079448   | 2.100580  | .171706  |
| 1                                                       | .193157   | 2.216491  | .329613  | 1                                                        | -2.489518 | 1.712196  | -.297069 |
| 1                                                       | 2.502847  | 1.348527  | -.639934 | 1                                                        | -.750543  | -2.254729 | .171557  |
| 1                                                       | 2.504055  | -1.346547 | -.640616 | 1                                                        | -3.008302 | -.933355  | -.291086 |
| 1                                                       | .195174   | -2.217053 | .328574  | 6                                                        | 2.531713  | .217436   | -.030477 |
|                                                         |           |           |          | 1                                                        | 3.360197  | -.171060  | -.628669 |
|                                                         |           |           |          | 1                                                        | 2.424097  | 1.293070  | -.235859 |
|                                                         |           |           |          | 1                                                        | 2.770827  | .089315   | 1.038151 |



| <b>17'</b> Et = -398.5924439(-398.7112019)<br>Nimag = 0 |           |           |           | <b>18'</b> Et = -269.2986506(-269.3874521)<br>Nimag = 0 |           |           |           |
|---------------------------------------------------------|-----------|-----------|-----------|---------------------------------------------------------|-----------|-----------|-----------|
| 6                                                       | -0.770812 | 1.224114  | 0.023693  | 6                                                       | -0.162605 | 1.187855  | 0.109887  |
| 6                                                       | 0.013057  | 0.057594  | 0.585533  | 6                                                       | 0.736211  | -0.008211 | 0.375570  |
| 6                                                       | -0.883402 | -1.132022 | 0.370219  | 6                                                       | -0.181716 | -1.182408 | 0.123398  |
| 6                                                       | -2.049075 | -0.691199 | -0.134941 | 6                                                       | -1.421685 | -0.727766 | -0.125553 |
| 6                                                       | -1.978056 | 0.769233  | -0.352719 | 6                                                       | -1.410494 | 0.750700  | -0.132189 |
| 1                                                       | 0.222542  | 0.215091  | 1.652847  | 1                                                       | 0.979959  | -0.006093 | 1.457928  |
| 7                                                       | 1.400842  | -0.052809 | -0.032143 | 8                                                       | 1.930666  | -0.101830 | -0.393936 |
| 1                                                       | -0.382052 | 2.232564  | -0.012212 | 1                                                       | 0.172637  | 2.217799  | 0.171822  |
| 1                                                       | -2.786791 | 1.366279  | -0.759826 | 1                                                       | -2.287400 | 1.365833  | -0.308250 |
| 1                                                       | -0.605571 | -2.145572 | 0.624568  | 1                                                       | 0.152090  | -2.211163 | 0.183020  |
| 1                                                       | -2.918097 | -1.299636 | -0.360625 | 1                                                       | -2.306942 | -1.331140 | -0.298161 |
| 8                                                       | 2.093552  | 0.957710  | 0.024481  | 1                                                       | 2.486069  | 0.658374  | -0.161544 |
| 8                                                       | 1.740673  | -1.128382 | -0.508288 |                                                         |           |           |           |

| <b>19'</b> Et = -293.3210101 (-293.4142663)<br>Nimag = 0 |           |           |          | <b>Quinone(q)</b> Et = -381.4516858(-381.5616335)<br>Nimag = 0 |           |           |         |
|----------------------------------------------------------|-----------|-----------|----------|----------------------------------------------------------------|-----------|-----------|---------|
| 6                                                        | -.153408  | 1.189213  | .106332  | 6                                                              | -1.268891 | -.671764  | .000000 |
| 6                                                        | .743851   | -.000001  | .371266  | 6                                                              | .000000   | -1.445180 | .000000 |
| 6                                                        | -.153408  | -1.189213 | .106329  | 6                                                              | 1.268884  | -.671724  | .000000 |
| 6                                                        | -1.399280 | -.741340  | -.119693 | 6                                                              | 1.268891  | .671764   | .000000 |
| 6                                                        | -1.399278 | .741340   | -.119698 | 6                                                              | .000000   | 1.445180  | .000000 |
| 1                                                        | 1.029835  | -.000002  | 1.437327 | 6                                                              | -1.268885 | .671724   | .000000 |
| 9                                                        | 1.925723  | .000000   | -.363309 | 8                                                              | .000000   | -2.670345 | .000000 |
| 1                                                        | .187614   | 2.215660  | .163729  | 8                                                              | .000001   | 2.670345  | .000000 |
| 1                                                        | -2.283717 | 1.348817  | -.281111 | 1                                                              | 2.183088  | -1.258551 | .000000 |
| 1                                                        | .187614   | -2.215660 | .163724  | 1                                                              | 2.183193  | 1.258439  | .000000 |
| 1                                                        | -2.283719 | -1.348816 | -.281105 | 1                                                              | -2.183089 | 1.258549  | .000000 |
|                                                          |           |           |          | 1                                                              | -2.183194 | -1.258437 | .000000 |

**Table S8.** The B3LYP/6-31G\* optimized geometries (in Cartesian coordinates), total electronic energies (in hartree/particle), of different rotamers of the substituent attached to the C7 position of the cycloadduct. The values in parenthesis implies single-point energies evaluated at the B3LYP/6-311+G\*\*//B3LYP/6-31G\* level.

|                                                                                                      |           |           |           |                                                                                 |           |           |           |
|------------------------------------------------------------------------------------------------------|-----------|-----------|-----------|---------------------------------------------------------------------------------|-----------|-----------|-----------|
|                                                                                                      |           |           |           |                                                                                 |           |           |           |
| <b>4</b> Et = -917.5145057 (-917.6999361)<br>Nimag = 0 $\Delta E_{rel} = 0.0$ kcal mol <sup>-1</sup> |           |           |           | <b>4'</b> Et = -917.5141908 (-917.6996178)<br>Nimag = 0 $\Delta E_{rel} = 0.19$ |           |           |           |
| 6                                                                                                    | -1.776682 | -0.008789 | -0.596146 | 6                                                                               | -1.775037 | 0.000020  | -0.601672 |
| 6                                                                                                    | -0.870381 | 1.121254  | -0.037898 | 6                                                                               | -0.864497 | 1.128269  | -0.043963 |
| 6                                                                                                    | -0.664171 | 0.654287  | 1.395416  | 6                                                                               | -0.663185 | 0.669824  | 1.392664  |
| 6                                                                                                    | -0.659489 | -0.685972 | 1.388886  | 6                                                                               | -0.663207 | -0.669914 | 1.392629  |
| 6                                                                                                    | -0.859654 | -1.138240 | -0.050744 | 6                                                                               | -0.864516 | -1.128274 | -0.044028 |
| 6                                                                                                    | 0.476923  | -0.778292 | -0.819180 | 6                                                                               | 0.472429  | -0.779945 | -0.818648 |
| 6                                                                                                    | 1.688889  | -1.478784 | -0.225790 | 6                                                                               | 1.680712  | -1.486147 | -0.224713 |
| 6                                                                                                    | 2.822838  | -0.660359 | 0.266444  | 6                                                                               | 2.815814  | -0.672662 | 0.273047  |
| 6                                                                                                    | 2.815630  | 0.684931  | 0.269902  | 6                                                                               | 2.815815  | 0.672657  | 0.273060  |
| 6                                                                                                    | 1.674011  | 1.493697  | -0.220659 | 6                                                                               | 1.680734  | 1.486154  | -0.224725 |
| 6                                                                                                    | 0.468522  | 0.782890  | -0.813845 | 6                                                                               | 0.472429  | 0.779965  | -0.818628 |
| 15                                                                                                   | -3.590146 | -0.103832 | -0.101749 | 15                                                                              | -3.546067 | 0.000016  | 0.053868  |
| 1                                                                                                    | -1.784995 | -0.011464 | -1.694934 | 1                                                                               | -1.787745 | 0.000053  | -1.697633 |
| 1                                                                                                    | -1.193199 | 2.153215  | -0.177319 | 1                                                                               | -1.178170 | 2.162638  | -0.189578 |
| 1                                                                                                    | -0.458986 | 1.311774  | 2.233409  | 1                                                                               | -0.463065 | 1.331867  | 2.227962  |
| 1                                                                                                    | -0.448832 | -1.351133 | 2.219434  | 1                                                                               | -0.463103 | -1.332009 | 2.227889  |
| 1                                                                                                    | -1.172195 | -2.171556 | -0.202915 | 1                                                                               | -1.178204 | -2.162629 | -0.189702 |
| 1                                                                                                    | 0.389165  | -1.153481 | -1.846001 | 1                                                                               | 0.379999  | -1.158596 | -1.843651 |
| 8                                                                                                    | 1.735274  | -2.698420 | -0.154207 | 8                                                                               | 1.722913  | -2.706191 | -0.157365 |
| 1                                                                                                    | 3.669234  | -1.227943 | 0.646410  | 1                                                                               | 3.657355  | -1.243839 | 0.658340  |
| 1                                                                                                    | 3.655977  | 1.259614  | 0.652647  | 1                                                                               | 3.657358  | 1.243824  | 0.658365  |
| 8                                                                                                    | 1.709281  | 2.713794  | -0.147717 | 8                                                                               | 1.722932  | 2.706197  | -0.157347 |
| 1                                                                                                    | 0.372351  | 1.164235  | -1.837592 | 1                                                                               | 0.379959  | 1.158646  | -1.843614 |
| 1                                                                                                    | -3.475856 | 0.369698  | 1.233396  | 1                                                                               | -4.012536 | 1.031914  | -0.814404 |

|   |           |          |           |   |           |           |           |
|---|-----------|----------|-----------|---|-----------|-----------|-----------|
| 1 | -3.955533 | 1.171785 | -0.623223 | 1 | -4.012545 | -1.031842 | -0.814446 |
|---|-----------|----------|-----------|---|-----------|-----------|-----------|

|                                                                                                               |           |           |           |                                                                                         |           |           |           |
|---------------------------------------------------------------------------------------------------------------|-----------|-----------|-----------|-----------------------------------------------------------------------------------------|-----------|-----------|-----------|
| 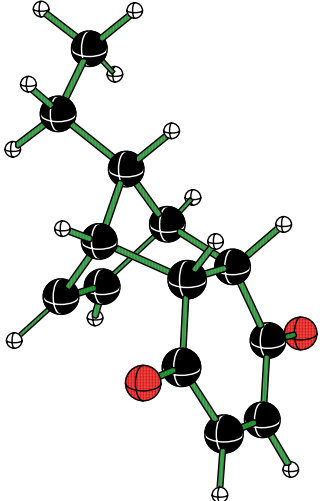                             |           |           |           |       |           |           |           |
| <b>8</b> Et = -654.2037292 ( <b>-654.3817009</b> )<br>Nimag = 0 $\Delta E_{rel} = 0.0$ kcal mol <sup>-1</sup> |           |           |           | <b>8'</b> Et = -654.1987757 ( <b>-654.3765559</b> )<br>Nimag = 0 $\Delta E_{rel} = 3.1$ |           |           |           |
| 6                                                                                                             | 1.755195  | -.346844  | -.451230  | 6                                                                                       | 1.707518  | -0.000338 | -0.888865 |
| 6                                                                                                             | .649948   | -1.333597 | .020305   | 6                                                                                       | 0.848317  | -1.138448 | -0.235983 |
| 6                                                                                                             | .439893   | -.879628  | 1.457431  | 6                                                                                       | 0.796680  | -0.676942 | 1.211132  |
| 6                                                                                                             | .639003   | .445393   | 1.494429  | 6                                                                                       | 0.796850  | 0.676701  | 1.211061  |
| 6                                                                                                             | .984122   | .896049   | .082846   | 6                                                                                       | 0.848602  | 1.138050  | -0.236099 |
| 6                                                                                                             | -.344380  | .766431   | -.765945  | 6                                                                                       | -0.545993 | 0.775064  | -0.845268 |
| 6                                                                                                             | -1.466076 | 1.631859  | -.216841  | 6                                                                                       | -1.664930 | 1.479519  | -0.137974 |
| 6                                                                                                             | -2.736684 | .987399   | .193509   | 6                                                                                       | -2.761976 | 0.668011  | 0.421849  |
| 6                                                                                                             | -2.936569 | -.342260  | .152442   | 6                                                                                       | -2.762147 | -0.667429 | 0.421918  |
| 6                                                                                                             | -1.907218 | -1.305953 | -.306592  | 6                                                                                       | -1.665298 | -1.479275 | -0.137800 |
| 6                                                                                                             | -.574757  | -.776777  | -.810388  | 6                                                                                       | -0.546189 | -0.775179 | -0.845183 |
| 1                                                                                                             | 1.807217  | -.322571  | -1.549835 | 1                                                                                       | 1.564616  | -0.000388 | -2.002678 |
| 1                                                                                                             | .817407   | -2.400485 | -.136076  | 1                                                                                       | 1.164914  | -2.180871 | -0.411691 |
| 1                                                                                                             | .093507   | -1.518761 | 2.262914  | 1                                                                                       | 0.756568  | -1.370976 | 2.047484  |
| 1                                                                                                             | .489733   | 1.112661  | 2.336888  | 1                                                                                       | 0.756920  | 1.370817  | 2.047354  |
| 1                                                                                                             | 1.449790  | 1.877106  | -.016760  | 1                                                                                       | 1.165461  | 2.180374  | -0.411914 |
| 1                                                                                                             | -.141651  | 1.146869  | -1.774520 | 1                                                                                       | -0.567047 | 1.133369  | -1.912611 |
| 8                                                                                                             | -1.332527 | 2.843257  | -.114099  | 8                                                                                       | -1.688418 | 2.714035  | -0.051574 |
| 1                                                                                                             | -3.505539 | 1.670018  | .548409   | 1                                                                                       | -3.596691 | 1.246782  | 0.855565  |
| 1                                                                                                             | -3.875214 | -.788960  | .472575   | 1                                                                                       | -3.597014 | -1.245942 | 0.855688  |
| 8                                                                                                             | -2.136796 | -2.506907 | -.278991  | 8                                                                                       | -1.689082 | -2.713774 | -0.051239 |
| 1                                                                                                             | -.480507  | -1.142609 | -1.840095 | 1                                                                                       | -0.567343 | -1.133598 | -1.912486 |
| 6                                                                                                             | 3.167683  | -.590980  | .088081   | 6                                                                                       | 3.192451  | -0.000550 | -0.644373 |
| 1                                                                                                             | 3.147980  | -.632928  | 1.182503  | 1                                                                                       | 3.620871  | -0.905855 | -1.157049 |
| 1                                                                                                             | 3.497338  | -1.581737 | -.254708  | 1                                                                                       | 3.621364  | 0.903701  | -1.158501 |
| 6                                                                                                             | 4.181935  | .463020   | -.373045  | 6                                                                                       | 3.651273  | 0.000509  | 0.789087  |
| 1                                                                                                             | 5.188596  | .221405   | -.014211  | 1                                                                                       | 4.768251  | 0.000493  | 0.827411  |

|   |          |          |           |   |          |           |          |
|---|----------|----------|-----------|---|----------|-----------|----------|
| 1 | 4.225698 | .524672  | -1.467675 | 1 | 3.279117 | 0.906572  | 1.326768 |
| 1 | 3.927672 | 1.459860 | .005296   | 1 | 3.279062 | -0.904714 | 1.328143 |

|                                                                                     |           |           |           |                                                                                                               |           |           |           |
|-------------------------------------------------------------------------------------|-----------|-----------|-----------|---------------------------------------------------------------------------------------------------------------|-----------|-----------|-----------|
| 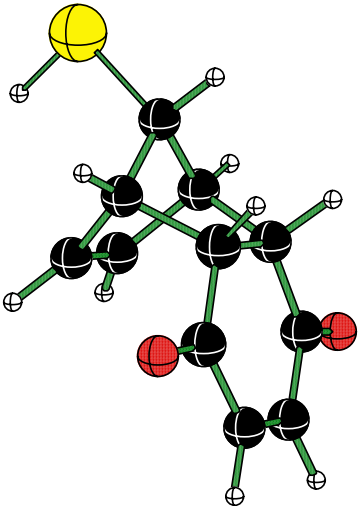   |           |           |           |                             |           |           |           |
| <b>10 Et = -973.759503 (-973.9460691)</b><br>Nimag = 0      ΔE <sub>rel</sub> = 0.0 |           |           |           | <b>10' Et = -973.7576147 (-973.9444129)</b><br>Nimag = 0      ΔE <sub>rel</sub> = 1.18 kcal mol <sup>-1</sup> |           |           |           |
| 6                                                                                   | 0.681678  | -0.670746 | 1.388589  | 6                                                                                                             | 0.700662  | -0.670381 | 1.372411  |
| 6                                                                                   | 0.875960  | -1.132968 | -0.047896 | 6                                                                                                             | 0.871779  | -1.131530 | -0.067980 |
| 6                                                                                   | -0.461286 | -0.781509 | -0.815575 | 6                                                                                                             | -0.471059 | -0.781431 | -0.825160 |
| 6                                                                                   | -0.461253 | 0.781480  | -0.815626 | 6                                                                                                             | -0.471016 | 0.781243  | -0.825346 |
| 6                                                                                   | 0.875938  | 1.132910  | -0.047842 | 6                                                                                                             | 0.871918  | 1.131485  | -0.068391 |
| 6                                                                                   | 0.681606  | 0.670596  | 1.388614  | 6                                                                                                             | 0.700818  | 0.670877  | 1.372188  |
| 6                                                                                   | -1.669143 | -1.486811 | -0.218681 | 6                                                                                                             | -1.672866 | -1.487203 | -0.216651 |
| 6                                                                                   | -2.811135 | -0.672673 | 0.260818  | 6                                                                                                             | -2.798710 | -0.672633 | 0.298972  |
| 6                                                                                   | -2.811107 | 0.672810  | 0.260779  | 6                                                                                                             | -2.798654 | 0.672806  | 0.298871  |
| 6                                                                                   | -1.669159 | 1.486878  | -0.218946 | 6                                                                                                             | -1.672703 | 1.487206  | -0.216790 |
| 6                                                                                   | 1.777080  | -0.000006 | -0.606131 | 6                                                                                                             | 1.771238  | -0.000151 | -0.622116 |
| 8                                                                                   | -1.705141 | 2.705934  | -0.136194 | 8                                                                                                             | -1.716467 | 2.707174  | -0.153597 |
| 8                                                                                   | -1.705406 | -2.705886 | -0.136347 | 8                                                                                                             | -1.716821 | -2.707167 | -0.153467 |
| 16                                                                                  | 3.547657  | 0.000000  | -0.133262 | 16                                                                                                            | 3.497927  | 0.000008  | 0.041869  |
| 1                                                                                   | 1.806158  | 0.000022  | -1.701441 | 1                                                                                                             | 1.828973  | -0.000315 | -1.714612 |
| 1                                                                                   | 1.203345  | -2.161015 | -0.197964 | 1                                                                                                             | 1.201039  | -2.158588 | -0.221016 |
| 1                                                                                   | 0.482885  | -1.331646 | 2.225314  | 1                                                                                                             | 0.518529  | -1.331403 | 2.212512  |
| 1                                                                                   | 0.482762  | 1.331441  | 2.225370  | 1                                                                                                             | 0.518808  | 1.332233  | 2.212052  |
| 1                                                                                   | 1.203320  | 2.160968  | -0.197839 | 1                                                                                                             | 1.201241  | 2.158465  | -0.221804 |
| 1                                                                                   | -0.373421 | 1.158754  | -1.841712 | 1                                                                                                             | -0.392938 | 1.158785  | -1.852113 |
| 1                                                                                   | -3.657572 | 1.243566  | 0.635646  | 1                                                                                                             | -3.635527 | 1.243612  | 0.694727  |
| 1                                                                                   | -3.657635 | -1.243373 | 0.635689  | 1                                                                                                             | -3.635635 | -1.243308 | 0.694906  |
| 1                                                                                   | -0.373569 | -1.158836 | -1.841654 | 1                                                                                                             | -0.392822 | -1.159227 | -1.851821 |
| 1                                                                                   | 3.350508  | -0.000035 | 1.202510  | 1                                                                                                             | 4.099364  | -0.002170 | -1.166268 |

|                                                    |           |           |           |                                                         |           |           |           |
|----------------------------------------------------|-----------|-----------|-----------|---------------------------------------------------------|-----------|-----------|-----------|
|                                                    |           |           |           |                                                         |           |           |           |
| <b>14</b> Et = -630.9205428 ( <b>-631.101355</b> ) |           |           |           | <b>14'</b> Et = -630.9159553 ( <b>-631.0975889</b> )    |           |           |           |
| Nimag = 0 $\Delta E_{rel} = 0.0$                   |           |           |           | Nimag = 0 $\Delta E_{rel} = 2.87 \text{ kcal mol}^{-1}$ |           |           |           |
| 6                                                  | 1.377796  | -1.483467 | -0.208790 | 6                                                       | -1.357752 | 1.486883  | -0.221103 |
| 6                                                  | 0.161341  | -0.793465 | -0.802560 | 6                                                       | -0.148610 | 0.781209  | -0.811725 |
| 6                                                  | 0.149720  | 0.769314  | -0.825996 | 6                                                       | -0.148851 | -0.781629 | -0.811323 |
| 6                                                  | 1.345800  | 1.489933  | -0.223983 | 6                                                       | -1.358376 | -1.486677 | -0.220880 |
| 6                                                  | 2.489920  | 0.690285  | 0.275894  | 6                                                       | -2.496950 | -0.672251 | 0.267470  |
| 6                                                  | 2.503376  | -0.654922 | 0.285321  | 6                                                       | -2.496778 | 0.673016  | 0.267127  |
| 6                                                  | -1.166720 | -1.140377 | -0.025531 | 6                                                       | 1.183404  | 1.126995  | -0.037293 |
| 6                                                  | -2.098712 | -0.024785 | -0.612943 | 6                                                       | 2.092745  | -0.000533 | -0.597066 |
| 6                                                  | -1.196858 | 1.121619  | -0.083790 | 6                                                       | 1.182937  | -1.127332 | -0.036415 |
| 6                                                  | -0.994530 | -0.643748 | 1.399833  | 6                                                       | 0.987861  | 0.669394  | 1.399697  |
| 6                                                  | -1.017436 | 0.698079  | 1.367622  | 6                                                       | 0.987574  | -0.668545 | 1.400178  |
| 7                                                  | -3.479330 | 0.065106  | -0.177573 | 7                                                       | 3.443121  | -0.000636 | -0.054443 |
| 8                                                  | 1.374247  | 2.710193  | -0.153558 | 8                                                       | -1.402915 | -2.706821 | -0.152105 |
| 8                                                  | 1.436782  | -2.703060 | -0.138535 | 8                                                       | -1.401599 | 2.707034  | -0.152167 |
| 1                                                  | -2.102849 | -0.057372 | -1.710066 | 1                                                       | 2.066017  | -0.000955 | -1.702319 |
| 1                                                  | -1.536782 | 2.141914  | -0.260177 | 1                                                       | 1.503322  | -2.160480 | -0.183156 |
| 1                                                  | -0.839058 | 1.380587  | 2.192001  | 1                                                       | 0.800466  | -1.331481 | 2.237865  |
| 1                                                  | -0.800850 | -1.277606 | 2.259103  | 1                                                       | 0.801031  | 1.333028  | 2.236886  |
| 1                                                  | -1.473399 | -2.180512 | -0.150250 | 1                                                       | 1.504062  | 2.159938  | -0.184861 |
| 1                                                  | 0.067237  | -1.184404 | -1.823239 | 1                                                       | -0.059582 | 1.155263  | -1.839192 |
| 1                                                  | 3.352094  | -1.214741 | 0.671795  | 1                                                       | -3.341860 | 1.244182  | 0.644794  |
| 1                                                  | 3.326737  | 1.272323  | 0.655427  | 1                                                       | -3.342182 | -1.242999 | 0.645426  |
| 1                                                  | 0.075477  | 1.129778  | -1.859351 | 1                                                       | -0.059480 | -1.156258 | -1.838543 |
| 1                                                  | -4.002008 | -0.744874 | -0.506435 | 1                                                       | 3.949758  | -0.815325 | -0.397331 |
| 1                                                  | -3.521708 | 0.051301  | 0.840479  | 1                                                       | 3.949482  | 0.814661  | -0.396281 |

|                                                                                         |           |           |           |                                                                                                                 |           |           |           |
|-----------------------------------------------------------------------------------------|-----------|-----------|-----------|-----------------------------------------------------------------------------------------------------------------|-----------|-----------|-----------|
| 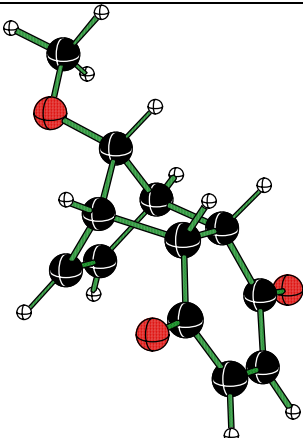       |           |           |           |                               |           |           |           |
| <b>16</b> Et = -690.0906904 ( <b>-690.2829441</b> )<br>Nimag = 0 $\Delta E_{rel} = 0.0$ |           |           |           | <b>16'</b> Et = -690.0862682 ( <b>-690.2779367</b> )<br>Nimag = 0 $\Delta E_{rel} = 2.77 \text{ kcal mol}^{-1}$ |           |           |           |
| 6                                                                                       | -0.530917 | -0.775582 | -0.812538 | 6                                                                                                               | -0.507820 | -0.782487 | -0.844210 |
| 6                                                                                       | 0.713320  | -1.305047 | -0.000392 | 6                                                                                                               | 0.879177  | -1.134816 | -0.174208 |
| 6                                                                                       | 1.769357  | -0.281357 | -0.473387 | 6                                                                                                               | 1.729009  | -0.000144 | -0.827496 |
| 6                                                                                       | 0.978097  | 0.941861  | 0.086569  | 6                                                                                                               | 0.879330  | 1.134630  | -0.174208 |
| 6                                                                                       | -0.339999 | 0.775584  | -0.765061 | 6                                                                                                               | -0.507738 | 0.782420  | -0.844239 |
| 6                                                                                       | 0.671353  | 0.459738  | 1.494432  | 6                                                                                                               | 0.792685  | 0.670935  | 1.267696  |
| 6                                                                                       | 0.518382  | -0.869967 | 1.444623  | 6                                                                                                               | 0.792603  | -0.671111 | 1.267706  |
| 6                                                                                       | -1.841659 | -1.339007 | -0.286372 | 6                                                                                                               | -1.669597 | -1.486537 | -0.160931 |
| 6                                                                                       | -2.897390 | -0.400708 | 0.164049  | 6                                                                                                               | -2.778075 | -0.672492 | 0.391762  |
| 6                                                                                       | -2.735064 | 0.934391  | 0.197010  | 6                                                                                                               | -2.778023 | 0.672801  | 0.391690  |
| 6                                                                                       | -1.483988 | 1.612462  | -0.216880 | 6                                                                                                               | -1.669415 | 1.486666  | -0.160998 |
| 8                                                                                       | -1.382880 | 2.827240  | -0.120977 | 8                                                                                                               | -1.699400 | 2.705523  | -0.071331 |
| 8                                                                                       | -2.032164 | -2.545532 | -0.238763 | 8                                                                                                               | -1.699784 | -2.705386 | -0.071242 |
| 8                                                                                       | 3.026418  | -0.547377 | 0.088942  | 8                                                                                                               | 3.123622  | -0.000251 | -0.687464 |
| 1                                                                                       | 1.855108  | -0.237782 | -1.573235 | 1                                                                                                               | 1.597692  | -0.000129 | -1.915599 |
| 1                                                                                       | 0.930236  | -2.358890 | -0.174177 | 1                                                                                                               | 1.189669  | -2.165197 | -0.349554 |
| 1                                                                                       | 0.222496  | -1.533280 | 2.249970  | 1                                                                                                               | 0.662484  | -1.330697 | 2.119323  |
| 1                                                                                       | 0.530115  | 1.109804  | 2.351143  | 1                                                                                                               | 0.662674  | 1.330536  | 2.119317  |
| 1                                                                                       | 1.417928  | 1.934969  | -0.010308 | 1                                                                                                               | 1.189819  | 2.165006  | -0.349560 |
| 1                                                                                       | -0.148727 | 1.160195  | -1.774562 | 1                                                                                                               | -0.499117 | 1.158636  | -1.874508 |
| 1                                                                                       | -3.523348 | 1.596891  | 0.547260  | 1                                                                                                               | -3.598098 | 1.243800  | 0.821120  |
| 1                                                                                       | -3.823098 | -0.871270 | 0.487487  | 1                                                                                                               | -3.598188 | -1.243386 | 0.821259  |
| 1                                                                                       | -0.449448 | -1.132369 | -1.846708 | 1                                                                                                               | -0.499293 | -1.158724 | -1.874473 |
| 6                                                                                       | 4.035514  | 0.360828  | -0.309356 | 6                                                                                                               | 3.730229  | 0.000166  | 0.593293  |
| 1                                                                                       | 4.975063  | -0.007412 | 0.109908  | 1                                                                                                               | 4.807365  | 0.000251  | 0.403205  |
| 1                                                                                       | 4.128288  | 0.408547  | -1.406374 | 1                                                                                                               | 3.467530  | 0.888991  | 1.182040  |
| 1                                                                                       | 3.852352  | 1.376770  | 0.069803  | 1                                                                                                               | 3.467776  | -0.888364 | 1.182587  |

|                                                                                         |           |           |           |                                                                                           |           |           |           |
|-----------------------------------------------------------------------------------------|-----------|-----------|-----------|-------------------------------------------------------------------------------------------|-----------|-----------|-----------|
| 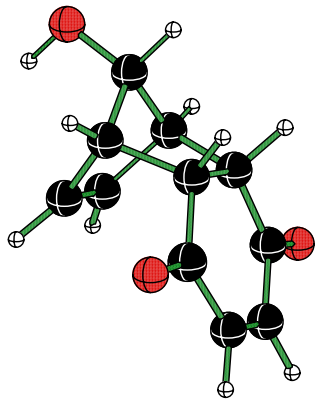       |           |           |           |         |           |           |           |
| <b>18</b> Et = -650.7870691 ( <b>-650.9764136</b> )<br>Nimag = 0 $\Delta E_{rel} = 0.0$ |           |           |           | <b>18'</b> Et = -650.7820579 ( <b>-650.9723987</b> )<br>Nimag = 0 $\Delta E_{rel} = 3.14$ |           |           |           |
| 6                                                                                       | 1.035397  | -0.672023 | 1.371830  | 6                                                                                         | 1.003236  | -.648439  | 1.403681  |
| 6                                                                                       | 1.189737  | -1.134038 | -0.069533 | 6                                                                                         | 1.179563  | -1.135138 | -.025373  |
| 6                                                                                       | -0.151740 | -0.781799 | -0.816319 | 6                                                                                         | -.147333  | -.790023  | -.805531  |
| 6                                                                                       | -0.151737 | 0.781795  | -0.816318 | 6                                                                                         | -.140289  | .774029   | -.821816  |
| 6                                                                                       | 1.189746  | 1.134037  | -0.069545 | 6                                                                                         | 1.200121  | 1.125229  | -.067301  |
| 6                                                                                       | 1.035415  | 0.672044  | 1.371824  | 6                                                                                         | 1.019487  | .690423   | 1.379800  |
| 6                                                                                       | -1.354300 | -1.486971 | -0.208636 | 6                                                                                         | -1.360652 | -1.486065 | -.211427  |
| 6                                                                                       | -2.493098 | -0.672705 | 0.278496  | 6                                                                                         | -2.492777 | -.662863  | .275519   |
| 6                                                                                       | -2.493093 | 0.672710  | 0.278501  | 6                                                                                         | -2.484033 | .682454   | .269952   |
| 6                                                                                       | -1.354294 | 1.486972  | -0.208636 | 6                                                                                         | -1.340709 | 1.488309  | -.221365  |
| 6                                                                                       | 2.097730  | -0.000007 | -0.629512 | 6                                                                                         | 2.091101  | -.015096  | -.606535  |
| 8                                                                                       | -1.390465 | 2.705915  | -0.123757 | 8                                                                                         | -1.373534 | 2.708037  | -.147888  |
| 8                                                                                       | -1.390473 | -2.705914 | -0.123749 | 8                                                                                         | -1.410733 | -2.705566 | -.137822  |
| 8                                                                                       | 3.432824  | -0.000013 | -0.197231 | 8                                                                                         | 3.400421  | .069958   | -.092816  |
| 1                                                                                       | 2.142799  | -0.000012 | -1.723723 | 1                                                                                         | 2.108234  | -.038629  | -1.708570 |
| 1                                                                                       | 1.516350  | -2.162309 | -0.225280 | 1                                                                                         | 1.493394  | -2.172392 | -.159228  |
| 1                                                                                       | 0.863463  | -1.329075 | 2.218031  | 1                                                                                         | .819619   | -1.292893 | 2.256532  |
| 1                                                                                       | 0.863497  | 1.329108  | 2.218019  | 1                                                                                         | .848915   | 1.369834  | 2.207647  |
| 1                                                                                       | 1.516360  | 2.162306  | -0.225314 | 1                                                                                         | 1.540371  | 2.146532  | -.237766  |
| 1                                                                                       | -0.077001 | 1.156563  | -1.844628 | 1                                                                                         | -.064857  | 1.137664  | -1.854066 |
| 1                                                                                       | -3.337351 | 1.243508  | 0.658466  | 1                                                                                         | -3.324808 | 1.260125  | .647259   |
| 1                                                                                       | -3.337359 | -1.243500 | 0.658458  | 1                                                                                         | -3.341181 | -1.226605 | .656798   |
| 1                                                                                       | -0.077002 | -1.156567 | -1.844628 | 1                                                                                         | -.056708  | -1.174678 | -1.829033 |
| 1                                                                                       | 3.412579  | -0.000009 | 0.775595  | 1                                                                                         | 3.881492  | -.725302  | -.368992  |
